# Supplementary material for: Asymmetric organocatalytic formal double-arylation of azomethines for the synthesis of highly enantiomerically enriched isoindolines
Source: Royal Society of Chemistry journal article supplement (doi:10.1039/b917246g), 2010-01-01
Supplement: b917246g.pdf [file b917246g.pdf]

## Supporting Information for

### Asymmetric Organocatalytic Formal Double-Arylation of Azomethines for the Synthesis of Highly Enantiomerically Enriched Isoindolines

Chao Wang, Xiao-Hua Chen, Shi-Ming Zhou, and Liu-Zhu Gong\*

Hefei National Laboratory for Physical Sciences at the Microscale and Department of Chemistry, University of Science and Technology of China, Hefei, 230026, China

E-mail: gonglz@ustc.edu.cn

**General Information:** NMR spectra were recorded on a Bruker-400 MHz spectrometer. HRMS (Bio TOF Q) spectra were recorded on P-SIMS-Gly of Bruker Daltonics Inc. Infrared spectra were recorded on a Nicolet MX-1E FT-IR spectrometer. Optical rotations were measured on Perkin Elmer Model 343 Polarimeter. HPLC analysis was performed on Waters-Breeze (2487 Dual Absorbance Detector and 1525 Binary HPLC Pump). Chiralpak AD, AS, and OD columns were purchased from Daicel Chemical Industries, LTD. X-ray crystallography analysis was performed on an Oxford Diffraction Gemini S Ultra CCD diffractionmeter equipped with mirror Cu K $\alpha$  ( $\lambda = 1.54184 \text{ \AA}$ ) radiation at room temperature. All structures were solved by direct methods and refined by full-matrix least-squares methods with SHELXL-97 programs. Elemental analysis was performed using an Elementar Vario EL III instrument. Solvents for the column chromatography were distilled before use. All starting materials commercially available were used directly. Quinones **1c** and **1d** were prepared according to the methods reported in the literature.<sup>1</sup> Catalyst **6e** was prepared according to previously described procedures<sup>2</sup> and was acidified with 4N HCl before use.

#### General Procedure for the Asymmetric Organocatalytic Formal Double-Arylation of Azomethines:

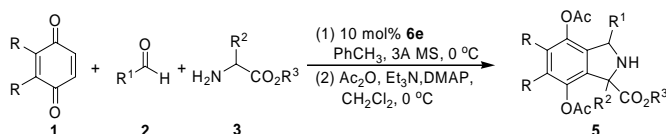

To a solution of an aldehyde **2** (0.24 mmol), the catalyst **6e** (0.02 mmol), and 3Å molecular sieves (300 mg) in PhCH<sub>3</sub> (2.0 mL) was added the amino ester (0.2 mmol). After the mixture was stirred at 25 °C

for 1 hour, the reaction mixture was cooled down to 0 °C and quinone **1** was added. The reaction mixture was stirred for ca. 12 hours until the reaction was complete (monitored by TLC). The reaction mixture was directly charged to a short column chromatography on silica gel (petroleum ether/EtOAc = 5/1) to remove the quinone, giving the crude **4** (when quinone **1b** and **1d** was used, **4** was partially isomerized), which was directly transferred to a test tube. The atmosphere was replaced with argon and CH<sub>2</sub>Cl<sub>2</sub> (2 mL) was added. The test tube was placed in an ice-water bath, and then DMAP (0.2 mmol), Ac<sub>2</sub>O (1.0 mmol) and Et<sub>3</sub>N (1.0 mmol) were added, sequentially. After the consumption of the starting material (monitored by TLC), the reaction mixture was directly charged to column chromatography on silica gel (petroleum ether/ ethyl acetate = 4/1) to give pure product **5**.

**Diethyl 3-(4-nitrophenyl)-4,9-dioxo-2,3,3a,4-tetrahydro-1H-benzo[f]isoindole-1,1(9H,9aH)-dicarboxylate (4a):** Yield: 95%;  $[\alpha]_D^{20} = -57.3$  (c 1.5, CHCl<sub>3</sub>); <sup>1</sup>H-NMR (CDCl<sub>3</sub>, 400 MHz) δ (ppm): 1.31-1.40 (m, 6H), 3.31 (s, 1H), 4.25 (dd,  $J_1 = 7.9$  Hz,  $J_2 = 10.5$  Hz, 1H), 4.30-4.48 (m, 5H), 4.98 (d,  $J = 10.5$  Hz, 1H), 7.34 (d,  $J = 8.8$  Hz, 2H), 7.5-7.6 (m, 3H), 7.82 (d,  $J = 8.8$  Hz, 2H), 7.87-7.90 (m, 1H); <sup>13</sup>C-NMR (CDCl<sub>3</sub>, 100 MHz) δ (ppm): 14.06, 14.10, 54.09, 54.84, 61.29, 62.32, 62.83, 75.04, 122.99, 126.28, 126.94, 128.59, 134.47, 134.71, 134.86, 134.92, 146.58, 147.24, 168.36, 170.12, 192.72, 193.55; Enantiomeric excess: 97%, determined by HPLC (Daicel Chirapak AD-H, hexane/ isopropanol = 70/ 30, flow rate 1.0 mL/min, T = 25 °C, 254 nm):  $t_R = 14.69$  min (minor),  $t_R = 23.41$  min (major); IR (KBr):  $\gamma$  3358, 2957, 2923, 2869, 2852, 2361, 2345, 1757, 1729, 1685, 1591, 1518, 1465, 1345, 1254, 1097, 855, 749 cm<sup>-1</sup>; HRMS: exact mass calcd for (C<sub>24</sub>H<sub>22</sub>N<sub>2</sub>O<sub>8</sub>) requires m/z 466.1376, found m/z 466.1376.

**Diethyl 4,9-diacetoxy-3-(4-nitrophenyl)-2,3-dihydro-1H-benzo[f]isoindole-1,1-dicarboxylate (5a):** Yield: 94%; m.p. 185-187 °C;  $[\alpha]_D^{20} = +88.3$  (c 2.1, CHCl<sub>3</sub>); <sup>1</sup>H-NMR (CDCl<sub>3</sub>, 400 MHz) δ (ppm): 1.29-1.33 (m, 6H), 1.93 (s, 3H), 2.45 (s, 3H), 3.97 (s, 1H), 4.13-4.43 (m, 4H), 5.79 (s, 1H), 7.50-7.56 (m, 4H), 7.67-7.74 (m, 2H), 8.17 (d,  $J = 8.5$  Hz, 2H); <sup>13</sup>C-NMR (CDCl<sub>3</sub>, 100 MHz) δ (ppm): 14.02, 14.09, 20.11, 20.94, 62.46, 63.11, 64.96, 76.24, 121.54, 122.92, 123.61, 126.93, 127.08, 127.50, 128.57, 128.90, 129.62, 132.50, 139.29, 141.43, 147.69, 149.21, 167.40, 168.39, 168.73, 169.57; Enantiomeric excess: 97%, determined by HPLC (Daicel Chirapak AD-H, hexane/ isopropanol = 70/ 30, flow rate 1.0 mL/min, T = 30 °C, 254 nm):  $t_R = 7.23$  min(minor),  $t_R = 21.32$  min(major); IR (KBr):  $\gamma$  3435, 2959, 2922, 2852, 1755, 1736, 1636, 1608, 1523, 1429, 1348, 1197, 1173, 1093, 860 cm<sup>-1</sup>; HRMS: exact mass calcd for (C<sub>28</sub>H<sub>26</sub>N<sub>2</sub>O<sub>10</sub>+H)<sup>+</sup> requires m/z 551.1666, found m/z 551.1660; Anal. Calcd for

C<sub>28</sub>H<sub>26</sub>N<sub>2</sub>O<sub>10</sub>: C, 61.09; H, 4.76; N, 5.09. Found: C, 60.84; H, 4.82; N, 4.68.

**Diethyl 4,9-diacetoxy-3-(4-bromophenyl)-2,3-dihydro-1H-benzo[f]isoindole-1,1-dicarboxylate(5b):**

Yield: 98%; m.p. 187-189 °C;  $[\alpha]_D^{20} = +77.0$  (c 2.4, CHCl<sub>3</sub>); <sup>1</sup>H-NMR (CDCl<sub>3</sub>, 400 MHz) δ (ppm): 1.26-1.32 (m, 6H), 1.90 (s, 3H), 2.43 (s, 3H), 3.85 (s, 1H), 4.12-4.40 (m, 4H), 5.63 (s, 1H), 7.20 (d, *J* = 7.1 Hz, 2H), 7.44-7.46 (m, 2H), 7.51-7.53 (m, 2H), 7.71 (d, *J* = 7.1 Hz, 2H); <sup>13</sup>C-NMR (CDCl<sub>3</sub>, 100 MHz) δ (ppm): 14.06, 14.10, 20.08, 20.10, 62.41, 62.96, 65.32, 76.13, 121.64, 122.05, 122.86, 126.87, 127.31, 128.42, 129.00, 130.47, 131.61, 132.94, 139.27, 140.57, 141.25, 167.54, 168.47, 168.83, 169.69; Enantiomeric excess: 95%, determined by HPLC (Daicel Chirapak AS-H, hexane/ isopropanol = 85/ 15, flow rate 1.0 mL/min, T = 30 °C, 254 nm): t<sub>R</sub> = 7.94 min(major), t<sub>R</sub> = 10.22 min(minor); IR (KBr): γ 3434, 3345, 2983, 2934, 1774, 1727, 1360, 1198, 1174, 1093, 1046, 1012, 766 cm<sup>-1</sup>; HRMS: exact mass calcd for (C<sub>28</sub>H<sub>26</sub>BrNO<sub>8</sub>+H)<sup>+</sup> requires m/z 584.0920, found m/z 584.0916; Anal. Calcd for C<sub>28</sub>H<sub>26</sub>BrNO<sub>8</sub>: C, 57.54; H, 4.48; N, 2.40. Found: C, 57.65; H, 4.62; N, 2.23.

**Diethyl 4,9-diacetoxy-3-(4-chlorophenyl)-2,3-dihydro-1H-benzo[f]isoindole-1,1-dicarboxylate (5c):**

Yield: 98%; m.p. 197-199 °C;  $[\alpha]_D^{20} = +73.3$  (c 2.2, CHCl<sub>3</sub>); <sup>1</sup>H-NMR (CDCl<sub>3</sub>, 400 MHz) δ (ppm): 1.27-1.32 (m, 6H), 1.90 (s, 3H), 2.43 (s, 3H), 3.84 (s, 1H), 4.11-4.41 (m, 4H), 5.64 (s, 1H), 7.25-7.31 (m, 4H), 7.49-7.53 (m, 2H), 7.71 (d, *J* = 7.0 Hz, 2H); <sup>13</sup>C-NMR (CDCl<sub>3</sub>, 100 MHz) δ (ppm): 14.08, 14.11, 20.10, 21.00, 62.43, 62.97, 65.29, 76.14, 121.65, 122.88, 126.88, 127.32, 128.44, 128.67, 129.02, 130.14, 133.02, 133.94, 139.30, 140.07, 141.27, 167.54, 168.48, 168.86, 169.71; Enantiomeric excess: 91%, determined by HPLC (Daicel Chirapak AS-H, hexane/ isopropanol = 90/ 10, flow rate 1.0 mL/min, T = 30 °C, 254 nm): t<sub>R</sub> = 11.74 min(major), t<sub>R</sub> = 15.28 min(minor); IR (KBr): γ 3435, 3342, 2984, 2936, 1774, 1727, 1609, 1490, 1431, 1359, 1198, 1174, 1093, 1046, 1016, 767 cm<sup>-1</sup>; HRMS: exact mass calcd for (C<sub>28</sub>H<sub>26</sub>ClNO<sub>8</sub>+H)<sup>+</sup> requires m/z 540.1425, found m/z 540.1424; Anal. Calcd for C<sub>28</sub>H<sub>26</sub>ClNO<sub>8</sub>: C, 62.28; H, 4.85; N, 2.59. Found: C, 62.47; H, 5.02; N, 2.43.

**Diethyl 4,9-diacetoxy-3-(4-cyanophenyl)-2,3-dihydro-1H-benzo[f]isoindole-1,1-dicarboxylate (5d):**

Yield: 95%; m.p. 173-175 °C;  $[\alpha]_D^{20} = +79.7$  (c 2.0, CHCl<sub>3</sub>); <sup>1</sup>H-NMR (CDCl<sub>3</sub>, 400 MHz) δ (ppm): 1.25-1.33 (m, 6H), 1.91 (s, 3H), 2.44 (s, 3H), 3.94 (s, 1H), 4.11-4.42 (m, 4H), 5.73 (s, 1H), 7.46 (d, *J* = 8.3 Hz, 2H), 7.51-7.55 (m, 2H), 7.62 (d, *J* = 8.3 Hz, 2H), 7.68-7.72 (m, 2H); <sup>13</sup>C-NMR (CDCl<sub>3</sub>, 100 MHz) δ (ppm): 14.05, 14.11, 20.08, 20.98, 62.47, 63.12, 65.33, 76.23, 111.93, 118.73, 121.59, 122.93, 127.08, 127.50, 128.57, 128.93, 129.57, 132.28, 132.52, 139.30, 141.41, 147.16, 167.39, 168.42,

168.74, 169.60; Enantiomeric excess: 93%, determined by HPLC (Daicel Chirapak AS-H, hexane/isopropanol = 70/ 30, flow rate 1.0 mL/min, T = 30 °C, 254 nm):  $t_R = 9.38$  min(major),  $t_R = 20.82$  min(minor); IR (KBr):  $\gamma$  3434, 2983, 2932, 2228, 1773, 1731, 1608, 1446, 1360, 1198, 1174, 1093, 1047, 883, 768  $\text{cm}^{-1}$ ; HRMS: exact mass calcd for  $(\text{C}_{29}\text{H}_{26}\text{N}_2\text{O}_8+\text{H})^+$  requires  $m/z$  531.1767, found  $m/z$  531.1768; Anal. Calcd for  $\text{C}_{29}\text{H}_{26}\text{N}_2\text{O}_8$ : C, 65.65; H, 4.94; N, 5.28. Found: C, 65.34; H, 5.01; N, 5.02.

**Diethyl 4,9-diacetoxy-3-(4-(methoxycarbonyl)phenyl)-2,3-dihydro-1H-benzo[f]isoindole-1,1-dicarboxylate (5e):** Yield: 91%; m.p. 174-176 °C;  $[\alpha]_D^{20} = +77.2$  (c 2.3,  $\text{CHCl}_3$ );  $^1\text{H-NMR}$  ( $\text{CDCl}_3$ , 400 MHz)  $\delta$  (ppm): 1.26-1.33 (m, 6H), 1.87 (s, 3H), 2.44 (s, 3H), 3.91 (s, 3H), 3.9 (s, 1H), 4.14-4.41 (m, 4H), 5.73 (s, 1H), 7.46 (d,  $J = 7.4\text{Hz}$ , 2H), 7.48-7.55 (m, 2H), 7.69-7.73 (m, 2H), 8.01 (d,  $J = 7.4$  Hz, 2H);  $^{13}\text{C-NMR}$  ( $\text{CDCl}_3$ , 100 MHz)  $\delta$  (ppm): 14.06, 14.09, 20.09, 20.98, 52.16, 62.43, 62.98, 65.56, 76.27, 121.63, 122.88, 126.89, 127.33, 128.46, 128.80, 128.99, 129.82, 129.93, 132.98, 139.30, 141.29, 146.69, 166.86, 167.51, 168.46, 168.84, 169.68; Enantiomeric excess: 95%, determined by HPLC (Daicel Chirapak AS-H, hexane/ isopropanol = 70/ 30, flow rate 1.0 mL/min, T = 30 °C, 254 nm):  $t_R = 6.65$  min(major),  $t_R = 11.52$  min(minor); IR (KBr):  $\gamma$  3435, 2959, 2922, 2852, 1769, 1732, 1631, 1442, 1360, 1199, 1175, 1095, 771  $\text{cm}^{-1}$ ; HRMS: exact mass calcd for  $(\text{C}_{30}\text{H}_{29}\text{NO}_{10}+\text{H})^+$  requires  $m/z$  564.1870, found  $m/z$  564.1868; Anal. Calcd for  $\text{C}_{30}\text{H}_{29}\text{NO}_{10}$ : C, 63.94; H, 5.19; N, 2.49. Found: C, 63.72; H, 5.30; N, 2.25.

**Diethyl 4,9-diacetoxy-3-phenyl-2,3-dihydro-1H-benzo[f]isoindole-1,1-dicarboxylate (5f):** Yield: 98%; m.p. 136-138 °C;  $[\alpha]_D^{20} = +157.7$  (c 0.8,  $\text{CHCl}_3$ );  $^1\text{H-NMR}$  ( $\text{CDCl}_3$ , 400 MHz)  $\delta$  (ppm): 1.27-1.32 (m, 6H), 1.82 (s, 3H), 2.43 (s, 3H), 3.9 (s, 1H), 4.13-4.40 (m, 4H), 5.66 (s, 1H), 7.25-7.34 (m, 5H), 7.48-7.52 (m, 2H), 7.70-7.72 (m, 2H);  $^{13}\text{C-NMR}$  ( $\text{CDCl}_3$ , 100 MHz)  $\delta$  (ppm): 14.08, 14.10, 19.97, 21.01, 62.39, 62.87, 66.09, 76.22, 121.70, 122.84, 126.71, 127.16, 127.57, 128.19, 128.35, 128.55, 128.79, 129.06, 133.43, 139.32, 141.17, 141.27, 167.58, 168.51, 168.92, 169.78; Enantiomeric excess: 83%, determined by HPLC (Daicel Chirapak AD-H, hexane/ isopropanol = 85/ 15, flow rate 1.0 mL/min, T = 25 °C, 254 nm):  $t_R = 7.73$  min(minor),  $t_R = 9.79$  min(major); IR (KBr):  $\gamma$  3335, 2982, 2358, 2331, 1759, 1727, 1358, 1239, 1195, 1171, 1094, 1028, 855, 772, 754  $\text{cm}^{-1}$ ; HRMS: exact mass calcd for  $(\text{C}_{28}\text{H}_{27}\text{NO}_8+\text{H})^+$  requires  $m/z$  506.1815, found  $m/z$  506.1822; Anal. Calcd for  $\text{C}_{28}\text{H}_{27}\text{NO}_8$ : C, 66.53; H, 5.38; N, 2.77. Found: C, 66.53; H, 5.46; N, 2.55.

**Diethyl 4,9-diacetoxy-3-p-tolyl-2,3-dihydro-1H-benzo[f]isoindole-1,1-dicarboxylate (5g):** Yield:

95%; m.p. 173-175 °C;  $[\alpha]_D^{20} = +84.3$  (c 1.6, CHCl<sub>3</sub>); <sup>1</sup>H-NMR (CDCl<sub>3</sub>, 400 MHz) δ (ppm): 1.26-1.32 (m, 6H), 1.84 (s, 3H), 2.34 (s, 3H), 2.43 (s, 3H), 3.8 (s, 1H), 4.11-4.40 (m, 4H), 5.62 (s, 1H), 7.13 (d, *J* = 7.8 Hz, 2H), 7.20 (d, *J* = 7.8 Hz, 2H), 7.48-7.52 (m, 2H), 7.70-7.72 (m, 2H); <sup>13</sup>C-NMR (CDCl<sub>3</sub>, 100 MHz) δ (ppm): 14.09, 20.04, 21.02, 21.26, 62.38, 62.83, 65.85, 76.20, 121.70, 122.83, 126.67, 127.13, 127.64, 128.32, 128.64, 129.08, 129.21, 133.57, 137.86, 138.26, 139.29, 141.14, 167.62, 168.55, 168.95, 169.82; Enantiomeric excess: 86%, determined by HPLC (Daicel Chirapak AD-H, hexane/ isopropanol = 85/ 15, flow rate 1.0 mL/min, T = 25 °C, 254 nm): *t<sub>R</sub>* = 7.57 min (minor), *t<sub>R</sub>* = 11.56 min (major); IR (KBr): γ 3341, 2985, 2923, 2856, 1774, 1731, 1430, 1359, 1261, 1197, 1173, 1093, 1044, 1022, 765 cm<sup>-1</sup>; HRMS: exact mass calcd for (C<sub>29</sub>H<sub>29</sub>NO<sub>8</sub>+H)<sup>+</sup> requires m/z 520.1971, found m/z 520.1970; Anal. Calcd for C<sub>29</sub>H<sub>29</sub>NO<sub>8</sub>: C, 67.04; H, 5.63; N, 2.70. Found: C, 67.02; H, 5.76; N, 2.45.

**Diethyl 4,9-diacetoxy-3-(3-chlorophenyl)-2,3-dihydro-1H-benzo[f]isoindole-1,1-dicarboxylate (5h):**

Yield: 98%; m.p. 180-182 °C;  $[\alpha]_D^{20} = +57.0$  (c 2.1, CHCl<sub>3</sub>); <sup>1</sup>H-NMR (CDCl<sub>3</sub>, 400 MHz) δ (ppm): 1.26-1.33 (m, 6H), 1.95 (s, 3H), 2.44 (s, 3H), 3.9 (s, 1H), 4.11-4.41 (m, 4H), 5.65 (s, 1H), 7.24-7.27 (m, 3H), 7.34 (s, 1H), 7.51-7.53 (m, 2H), 7.70-7.72 (m, 2H); <sup>13</sup>C-NMR (CDCl<sub>3</sub>, 100 MHz) δ (ppm): 14.07, 14.11, 20.08, 20.99, 62.45, 63.00, 65.42, 76.19, 121.66, 122.89, 126.89, 127.19, 127.32, 128.26, 128.46, 128.94, 129.03, 129.82, 132.96, 134.26, 139.35, 141.27, 143.78, 167.56, 168.48, 168.89, 169.72; Enantiomeric excess: 94%, determined by HPLC (Daicel Chirapak AD-H, hexane/ isopropanol = 85/ 15, flow rate 1.0 mL/min, T = 30 °C, 254 nm): *t<sub>R</sub>* = 7.71 min(minor), *t<sub>R</sub>* = 9.08 min(major); IR (KBr): γ 3439, 3338, 2987, 2928, 1771, 1728, 1439, 1359, 1200, 1176, 1016, 767 cm<sup>-1</sup>; HRMS: exact mass calcd for (C<sub>28</sub>H<sub>26</sub>ClNO<sub>8</sub>+H)<sup>+</sup> requires m/z 540.1425, found m/z 540.1426; Anal. Calcd for C<sub>28</sub>H<sub>26</sub>ClNO<sub>8</sub>: C, 62.28; H, 4.85; N, 2.59. Found: C, 62.44; H, 4.94; N, 2.44.

**Diethyl 4,9-diacetoxy-3-(3-methoxyphenyl)-2,3-dihydro-1H-benzo[f]isoindole-1,1-dicarboxylate (5i):**

Yield: 98%; m.p. 128-130 °C;  $[\alpha]_D^{20} = +81.6$  (c 2.1, CHCl<sub>3</sub>); <sup>1</sup>H-NMR (CDCl<sub>3</sub>, 400 MHz) δ (ppm): 1.27-1.32 (m, 6H), 1.88 (s, 3H), 2.43 (s, 3H), 3.74 (s, 3H), 3.85 (s, 1H), 4.13-4.40 (m, 4H), 5.64 (s, 1H), 6.84-6.87 (m, 2H), 6.92-6.94 (m, 1H), 7.22-7.24 (m, 1H), 7.48-7.52 (m, 2H), 7.70-7.72 (m, 2H); <sup>13</sup>C-NMR (CDCl<sub>3</sub>, 100 MHz) δ (ppm): 14.09, 14.12, 20.03, 21.02, 55.30, 62.39, 62.90, 66.05, 76.20, 113.97, 114.10, 121.11, 121.74, 122.86, 126.73, 127.18, 127.52, 128.36, 129.10, 129.46, 133.34, 139.38, 141.18, 142.91, 159.85, 167.66, 168.54, 168.95, 169.81; Enantiomeric excess: 97%, determined by HPLC (Daicel Chirapak AS-H, hexane/ isopropanol = 70/ 30, flow rate 1.0 mL/min, T = 30 °C, 254 nm): *t<sub>R</sub>* = 5.61 min(major), *t<sub>R</sub>* = 7.24 min(minor); IR (KBr): γ 3351, 2982, 2938, 1770, 1732,

1608, 1360, 1240, 1198, 1173, 1044, 766  $\text{cm}^{-1}$ ; HRMS: exact mass calcd for  $(\text{C}_{29}\text{H}_{29}\text{NO}_9+\text{H})^+$  requires  $m/z$  536.1921, found  $m/z$  536.1917; Anal. Calcd for  $\text{C}_{29}\text{H}_{29}\text{NO}_9$ : C, 65.04; H, 5.46; N, 2.62. Found: C, 65.04; H, 5.60; N, 2.40.

**Diethyl 4,9-diacetoxy-3-(2,3-dichlorophenyl)-2,3-dihydro-1H-benzo[f]isoindole-1,1-dicarboxylate (5j):** Yield: 96%; m.p. 68-70  $^{\circ}\text{C}$ ;  $[\alpha]_{\text{D}}^{20} = -15.1$  (c 2.2,  $\text{CHCl}_3$ );  $^1\text{H-NMR}$  ( $\text{CDCl}_3$ , 400 MHz)  $\delta$  (ppm): 1.27-1.33 (m, 6H), 2.00 (s, 3H), 2.43 (s, 3H), 3.97 (s, 1H), 4.13-4.42 (m, 4H), 6.37 (s, 1H), 7.10-7.14 (m, 1H), 7.12-7.24 (m, 1H), 7.38-7.40 (m, 1H), 7.48-7.55 (m, 2H), 7.62-7.64 (m, 1H), 7.70-7.73 (m, 1H);  $^{13}\text{C-NMR}$  ( $\text{CDCl}_3$ , 100 MHz)  $\delta$  (ppm): 14.06, 14.10, 19.94, 20.99, 61.77, 62.39, 63.09, 76.23, 121.71, 122.99, 126.89, 127.03, 127.39, 127.81, 128.55, 128.98, 129.53, 129.82, 131.75, 132.80, 139.40, 141.45, 167.58, 168.42, 168.84, 169.62; Enantiomeric excess: 91%, determined by HPLC (Daicel Chirapak AS-H, hexane/ isopropanol = 90/ 10, flow rate 1.0 mL/min, T = 30  $^{\circ}\text{C}$ , 254 nm):  $t_{\text{R}} = 7.83$  min(major),  $t_{\text{R}} = 10.35$  min(minor); IR (KBr):  $\gamma$  3349, 3074, 2982, 2937, 1773, 1735, 1427, 1360, 1241 1197, 1172, 1094, 1046, 764  $\text{cm}^{-1}$ ; HRMS: exact mass calcd for  $(\text{C}_{28}\text{H}_{25}\text{Cl}_2\text{NO}_8+\text{H})^+$  requires  $m/z$  574.1035, found  $m/z$  574.1042; Anal. Calcd for  $\text{C}_{28}\text{H}_{25}\text{Cl}_2\text{NO}_8$ : C, 58.55; H, 4.39; N, 2.44. Found: C, 58.58; H, 4.52; N, 2.17.

**Diethyl 4,9-diacetoxy-3-(thiophen-3-yl)-2,3-dihydro-1H-benzo[f]isoindole-1,1-dicarb oxylate (5k):** Yield: 96%; m.p. 140-142  $^{\circ}\text{C}$ ;  $[\alpha]_{\text{D}}^{20} = +62.3$  (c 2.0,  $\text{CHCl}_3$ );  $^1\text{H-NMR}$  ( $\text{CDCl}_3$ , 400 MHz)  $\delta$  (ppm): 1.25-1.31(m, 6H), 1.95 (s, 3H), 2.42 (s, 3H), 3.80 (s, 1H), 4.13-4.38 (m, 4H), 5.80 (s, 1H), 6.93-6.95 (m, 1H), 7.24-7.26 (m, 2H), 7.47-7.53 (m, 2H), 7.70-7.76 (m, 2H);  $^{13}\text{C-NMR}$  ( $\text{CDCl}_3$ , 100 MHz)  $\delta$  (ppm): 13.98, 19.94, 20.90, 60.92, 62.35, 62.76, 75.92, 121.61, 122.75, 123.30, 126.24, 126.68, 127.14, 127.23, 127.55, 128.27, 128.95, 132.50, 139.28, 141.13, 142.15, 167.56, 168.42, 168.81, 169.59; Enantiomeric excess: 94%, determined by HPLC (Daicel Chirapak AD-H, hexane/ isopropanol = 70/ 30, flow rate 1.0 mL/min, T = 30  $^{\circ}\text{C}$ , 254 nm):  $t_{\text{R}} = 5.54$  min(minor),  $t_{\text{R}} = 8.13$  min(major); IR (KBr):  $\gamma$  3436, 3343, 2980, 2924, 1773, 1731, 1610, 1429, 1359, 1241, 1198, 1174, 1094, 767  $\text{cm}^{-1}$ ; HRMS: exact mass calcd for  $(\text{C}_{26}\text{H}_{25}\text{NO}_8\text{S}+\text{H})^+$  requires  $m/z$  512.1379, found  $m/z$  512.1371; Anal. Calcd for  $\text{C}_{26}\text{H}_{25}\text{NO}_8\text{S}$ : C, 61.05; H, 4.93; N, 2.74. Found: C, 61.11; H, 5.04; N, 2.58.

**Diethyl 4,9-diacetoxy-3-(furan-2-yl)-2,3-dihydro-1H-benzo[f]isoindole-1,1-dicarboxylate (5l):** Yield: 90%; m.p. 116-118  $^{\circ}\text{C}$ ;  $[\alpha]_{\text{D}}^{20} = +78.1$  (c 1.7,  $\text{CHCl}_3$ );  $^1\text{H-NMR}$  ( $\text{CDCl}_3$ , 400 MHz)  $\delta$  (ppm): 1.26-1.31 (m, 6H), 2.14 (s, 3H), 2.42 (s, 3H), 3.81 (s, 1H), 4.16-4.37 (m, 4H), 5.78 (s, 1H), 6.28-6.34

(m, 2H), 7.36-7.37 (m, 1H), 7.51-7.53 (m, 2H), 7.69-7.80 (m, 2H);  $^{13}\text{C}$ -NMR ( $\text{CDCl}_3$ , 100 MHz)  $\delta$  (ppm): 14.02, 20.27, 20.95, 58.88, 62.53, 62.85, 75.97, 108.35, 110.31, 121.69, 122.86, 126.83, 127.26, 128.50, 128.97, 130.76, 139.36, 141.28, 142.84, 153.16, 167.80, 168.44, 168.71, 169.52; Enantiomeric excess: 90%, determined by HPLC (Daicel Chirapak AD-H, hexane/ isopropanol = 85/ 15, flow rate 1.0 mL/min, T = 30 °C, 254 nm):  $t_{\text{R}}$  = 8.96 min(minor),  $t_{\text{R}}$  = 11.27 min(major); IR (KBr):  $\gamma$  3348, 2984, 2937, 1771, 1732, 1360, 1241, 1198, 1174, 1095, 1045, 767  $\text{cm}^{-1}$ ; HRMS: exact mass calcd for  $(\text{C}_{26}\text{H}_{25}\text{NO}_9+\text{H})^+$  requires m/z 496.1608, found m/z 496.1606; Anal. Calcd for  $\text{C}_{26}\text{H}_{25}\text{NO}_9$ : C, 63.03; H, 5.09; N, 2.83. Found: C, 63.13; H, 5.19; N, 2.63.

**Diethyl 4,7-diacetoxy-3-(4-nitrophenyl)isoindoline-1,1-dicarboxylate (5m):** Yield: 89%; m.p. 122-125 °C;  $[\alpha]_{\text{D}}^{20}$  = -50.1 (c 1.8,  $\text{CHCl}_3$ );  $^1\text{H}$ -NMR ( $\text{CDCl}_3$ , 400 MHz)  $\delta$  (ppm): 1.27-1.33 (m, 6H), 1.80 (s, 3H), 2.28 (s, 3H), 3.95 (d,  $J$  = 6.1 Hz, 1H), 4.13-4.39 (m, 4H), 5.70 (d,  $J$  = 6.1 Hz, 1H), 7.05 (d,  $J$  = 8.8 Hz, 1H), 7.20 (d,  $J$  = 8.8 Hz, 1H), 7.48 (d,  $J$  = 9.1 Hz, 2H), 8.17 (d,  $J$  = 9.1 Hz, 2H);  $^{13}\text{C}$ -NMR ( $\text{CDCl}_3$ , 100 MHz)  $\delta$  (ppm): 14.03, 14.16, 20.30, 21.10, 62.50, 63.12, 65.27, 76.77, 123.67, 124.51, 124.71, 129.38, 130.36, 136.73, 143.03, 144.26, 147.71, 149.44, 167.75, 168.45, 168.84, 169.71; Enantiomeric excess: 94%, determined by HPLC (Daicel Chirapak AS-H, hexane/ isopropanol = 70/ 30, flow rate 1.0 mL/min, T = 30 °C, 254 nm):  $t_{\text{R}}$  = 11.15 min(major),  $t_{\text{R}}$  = 22.60 min(minor); IR (KBr):  $\gamma$  3351, 2983, 2938, 1770, 1737, 1598, 1522, 1485, 1369, 1348, 1244, 1184, 1046, 1016, 938, 894, 858, 833, 650  $\text{cm}^{-1}$ ; HRMS: exact mass calcd for  $(\text{C}_{24}\text{H}_{24}\text{N}_2\text{O}_{10}+\text{H})^+$  requires m/z 501.1509, found m/z 501.1504; Anal. Calcd for  $\text{C}_{24}\text{H}_{24}\text{N}_2\text{O}_{10}$ : C, 57.60; H, 4.83; N, 5.60. Found: C, 57.86; H, 4.98; N, 5.26.

**Diethyl 4,7-diacetoxy-3-(4-bromophenyl)isoindoline-1,1-dicarboxylate (5n):** Yield: 86%; m.p. 128-130 °C;  $[\alpha]_{\text{D}}^{20}$  = -53.2 (c 1.8,  $\text{CHCl}_3$ );  $^1\text{H}$ -NMR ( $\text{CDCl}_3$ , 400 MHz)  $\delta$  (ppm): 1.26-1.31 (m, 6H), 1.77 (s, 3H), 2.27 (s, 3H), 3.83 (s, 1H), 4.12-4.37 (m, 4H), 5.54 (s, 1H), 7.05 (d,  $J$  = 8.7 Hz, 1H), 7.14-7.18 (m, 3H), 7.44 (d,  $J$  = 9.0 Hz, 2H);  $^{13}\text{C}$ -NMR ( $\text{CDCl}_3$ , 100 MHz)  $\delta$  (ppm): 14.03, 14.12, 20.18, 21.11, 62.40, 62.91, 65.55, 76.48, 122.00, 124.25, 124.39, 130.14, 130.47, 131.61, 137.32, 140.90, 143.09, 144.15, 167.93, 168.52, 168.95, 169.82; Enantiomeric excess: 94%, determined by HPLC (Daicel Chirapak AD-H, hexane/ isopropanol = 70/ 30, flow rate 1.0 mL/min, T = 30 °C, 254 nm):  $t_{\text{R}}$  = 7.07 min(minor),  $t_{\text{R}}$  = 12.39 min(major); IR (KBr):  $\gamma$  3443, 3355, 2982, 2924, 2852, 1769, 1736, 1486, 1368, 1244, 1184, 1093, 1046, 1013, 892, 859, 651  $\text{cm}^{-1}$ ; HRMS: exact mass calcd for  $(\text{C}_{24}\text{H}_{24}\text{BrNO}_8+\text{H})^+$  requires m/z 534.0764, found m/z 534.0757; Anal. Calcd for  $\text{C}_{24}\text{H}_{24}\text{BrNO}_8$ : C, 53.94; H, 4.53; N, 2.62. Found: C, 54.17; H, 4.59; N, 2.45.

**Diethyl 4,7-diacetoxy-3-(4-chlorophenyl)isoindoline-1,1-dicarboxylate (5o):** Yield: 89%; m.p. 113-115 °C;  $[\alpha]_D^{20} = -52.7$  (c 1.7, CHCl<sub>3</sub>); <sup>1</sup>H-NMR (CDCl<sub>3</sub>, 400 MHz) δ (ppm): 1.26-1.32 (m, 6H), 1.76 (s, 3H), 2.27 (s, 3H), 3.83 (s, 1H), 4.15-4.34 (m, 4H), 5.56 (s, 1H), 7.04 (d, *J* = 8.8 Hz, 1H), 7.17 (d, *J* = 8.8 Hz, 1H), 7.22 (d, *J* = 8.4 Hz, 2H), 7.28 (d, *J* = 8.4 Hz, 2H); <sup>13</sup>C-NMR (CDCl<sub>3</sub>, 100 MHz) δ (ppm): 14.02, 14.11, 20.16, 21.10, 62.38, 62.89, 65.49, 76.47, 124.22, 124.37, 128.64, 129.78, 130.46, 133.85, 137.38, 140.38, 143.09, 144.15, 167.90, 168.50, 168.96, 169.82; Enantiomeric excess: 91%, determined by HPLC (Daicel Chirapak AS-H, hexane/ isopropanol = 70/ 30, flow rate 1.0 mL/min, T = 25 °C, 254 nm): *t*<sub>R</sub> = 6.76 min(major), *t*<sub>R</sub> = 8.36 min(minor); IR (KBr): γ 3353, 3072, 2983, 2935, 2896, 1770, 1737, 1485, 1369, 1244, 1180, 1049, 1015, 841, 735, 651, 593 cm<sup>-1</sup>; HRMS: exact mass calcd for (C<sub>24</sub>H<sub>24</sub>ClNO<sub>8</sub>+H)<sup>+</sup> requires *m/z* 490.1269, found *m/z* 490.1275; Anal. Calcd for C<sub>24</sub>H<sub>24</sub>ClNO<sub>8</sub>: C, 58.84; H, 4.94; N, 2.86. Found: C, 58.82; H, 4.97; N, 2.50.

**Diethyl 4,7-diacetoxy-3-(3-methoxyphenyl)isoindoline-1,1-dicarboxylate (5p):** Yield: 92%; m.p. 138-140 °C;  $[\alpha]_D^{20} = -49.3$  (c 1.8, CHCl<sub>3</sub>); <sup>1</sup>H-NMR (CDCl<sub>3</sub>, 400 MHz) δ (ppm): 1.26-1.31 (m, 6H), 1.74 (s, 3H), 2.27 (s, 3H), 3.74 (s, 3H), 3.83 (s, 1H), 4.12-4.37 (m, 4H), 5.55 (s, 1H), 6.81-6.83 (m, 2H), 6.85-6.87 (m, 1H), 7.03 (d, *J* = 8.7 Hz, 1H), 7.16 (d, *J* = 8.7 Hz, 1H), 7.21-7.26 (m, 1H); <sup>13</sup>C-NMR (CDCl<sub>3</sub>, 100 MHz) δ (ppm): 14.05, 14.12, 20.11, 21.12, 55.29, 62.35, 62.83, 66.26, 76.55, 113.70, 113.90, 120.75, 123.99, 124.37, 129.46, 130.55, 137.76, 143.24, 144.11, 159.84, 168.03, 168.56, 169.08, 169.94; Enantiomeric excess: 94%, determined by HPLC (Daicel Chirapak AS-H, hexane/ isopropanol = 70/ 30, flow rate 1.0 mL/min, T = 30 °C, 254 nm): *t*<sub>R</sub> = 5.84 min(major), *t*<sub>R</sub> = 7.43 min(minor); IR (KBr): γ 3443, 3350, 3074, 2980, 2934, 2851, 1770, 1734, 1609, 1486, 1368, 1245, 1210, 1183, 1047, 896, 738, 599 cm<sup>-1</sup>; HRMS: exact mass calcd for (C<sub>25</sub>H<sub>27</sub>NO<sub>9</sub>+H)<sup>+</sup> requires *m/z* 486.1764, found *m/z* 486.1758; Anal. Calcd for C<sub>25</sub>H<sub>27</sub>NO<sub>9</sub>: C, 61.85; H, 5.61; N, 2.89. Found: C, 61.85; H, 5.66; N, 2.64.

**Diethyl 4,7-diacetoxy-5,6-dimethyl-3-(4-nitrophenyl)isoindoline-1,1-dicarboxylate (5q):** Yield: 89%; m.p. 159-161 °C;  $[\alpha]_D^{20} = -14.4$  (c 1.9, CHCl<sub>3</sub>); <sup>1</sup>H-NMR (CDCl<sub>3</sub>, 400 MHz) δ (ppm): 1.26-1.33 (m, 6H), 1.82 (s, 3H), 1.98 (s, 3H), 2.07 (s, 3H), 2.30 (s, 3H), 3.89 (s, 1H), 4.10-4.40 (m, 4H), 5.65 (s, 1H), 7.47 (d, *J* = 9.2 Hz, 2H), 8.16 (d, *J* = 9.2 Hz, 2H); <sup>13</sup>C-NMR (CDCl<sub>3</sub>, 100 MHz) δ (ppm): 13.51, 14.06, 14.14, 14.35, 20.04, 20.89, 62.37, 62.99, 65.35, 77.30, 123.61, 127.99, 129.45, 132.82, 133.10, 134.40, 141.90, 143.02, 147.65, 149.85, 167.35, 167.93, 169.11, 169.81; Enantiomeric excess: 94%,



determined by HPLC (Daicel Chirapak IA-H, hexane/ isopropanol = 70/ 30, flow rate 1.0 mL/min, T = 25 °C, 254 nm):  $t_R$  = 6.53 min(minor),  $t_R$  = 21.54 min(major); IR (KBr):  $\gamma$  3434, 3367, 2982, 2926, 1768, 1736, 1521, 1347, 1189, 1086, 857, 702, 592  $\text{cm}^{-1}$ ; HRMS: exact mass calcd for  $(\text{C}_{26}\text{H}_{28}\text{N}_2\text{O}_{10}+\text{H})^+$  requires m/z 529.1822, found m/z 529.1827; Anal. Calcd for  $\text{C}_{26}\text{H}_{28}\text{N}_2\text{O}_{10}$ : C, 59.09; H, 5.34; N, 5.30. Found: C, 59.51; H, 5.52; N, 4.93.

**Diethyl 4,7-diacetoxy-5,6-dichloro-3-(4-nitrophenyl)isoindoline-1,1-dicarboxylate (5r):** Yield: 78%; m.p. 124-126 °C;  $[\alpha]_D^{20} = +5.5$  (c 1.8,  $\text{CHCl}_3$ );  $^1\text{H-NMR}$  ( $\text{CDCl}_3$ , 400 MHz)  $\delta$  (ppm): 1.29-1.34 (m, 6H), 1.88 (s, 3H), 2.33 (s, 3H), 3.93 (d,  $J = 6.0$  Hz, 1H), 4.11-4.42 (m, 4H), 5.70 (d,  $J = 6.0$  Hz, 1H), 7.48 (d,  $J = 9.1$  Hz, 2H), 8.18 (d,  $J = 9.1$  Hz, 2H);  $^{13}\text{C-NMR}$  ( $\text{CDCl}_3$ , 100 MHz)  $\delta$  (ppm): 14.03, 14.12, 19.83, 20.64, 62.76, 63.41, 65.42, 77.30, 123.73, 129.19, 129.48, 129.58, 130.12, 136.57, 140.99, 142.43, 147.92, 148.33, 166.17, 166.39, 168.14, 168.93; Enantiomeric excess: 85%, determined by HPLC (Daicel Chirapak AS-H, hexane/ isopropanol = 70/ 30, flow rate 1.0 mL/min, T = 30 °C, 254 nm):  $t_R$  = 8.53 min(major),  $t_R$  = 14.53 min(minor); IR (KBr):  $\gamma$  3435, 3357, 2983, 2925, 1782, 1735, 1522, 1429, 1369, 1348, 1170, 1016, 917, 861, 843, 699  $\text{cm}^{-1}$ ; HRMS: exact mass calcd for  $(\text{C}_{24}\text{H}_{22}\text{Cl}_2\text{N}_2\text{O}_{10}+\text{H})^+$  requires m/z 569.0730, found m/z 569.0725; Anal. Calcd for  $\text{C}_{24}\text{H}_{22}\text{Cl}_2\text{N}_2\text{O}_{10}$ : C, 50.63; H, 3.89; N, 4.92. Found: C, 50.75; H, 3.97; N, 4.53.

**1-(Methoxycarbonyl)-3-(4-nitrophenyl)-1-phenyl-2,3-dihydro-1H-benzo[f]isoindole-4,9-diyl diacetate (5s):** Yield: 76%;  $[\alpha]_D^{20} = +82.8$  (c 0.9,  $\text{CHCl}_3$ );  $^1\text{H-NMR}$  ( $\text{CDCl}_3$ , 400 MHz)  $\delta$  (ppm): 1.94 (s, 3H), 2.19 (s, 3H), 3.49 (s, 1H), 3.76 (s, 3H), 5.61 (s, 1H), 7.32-7.35 (m, 5H), 7.46 (d,  $J = 8.7$  Hz, 2H), 7.53-7.57 (m, 2H), 7.69-7.77 (m, 2H), 8.21 (d,  $J = 8.7$  Hz, 2H);  $^{13}\text{C-NMR}$  ( $\text{CDCl}_3$ , 100 MHz)  $\delta$  (ppm): 20.13, 20.54, 53.31, 64.89, 77.00, 121.69, 122.59, 123.96, 127.29, 127.52, 128.19, 128.48, 128.83, 129.35, 132.28, 132.94, 139.38, 140.70, 140.75, 147.80, 148.36, 167.59, 168.63, 172.58; Enantiomeric excess: 89%, determined by HPLC (Daicel Chirapak OD-H, hexane/ isopropanol = 85/ 15, flow rate 1.0 mL/min, T = 25 °C, 254 nm):  $t_R$  = 17.56 min(minor),  $t_R$  = 26.96 min(major); IR (KBr):  $\gamma$  3073, 2950, 2359, 2341, 1770, 1732, 1520, 1348, 1196, 1169, 1030, 858, 765, 698  $\text{cm}^{-1}$ ; HRMS: exact mass calcd for  $(\text{C}_{30}\text{H}_{24}\text{N}_2\text{O}_8+\text{H})^+$  requires m/z 541.1611, found m/z 541.1614.

**1-(4-Chlorophenyl)-1-(methoxycarbonyl)-3-(4-nitrophenyl)-2,3-dihydro-1H-benzo[f]isoindole-4,9-diyl diacetate (5t):** Yield: 80%;  $[\alpha]_D^{20} = +108.2$  (c 0.9,  $\text{CHCl}_3$ );  $^1\text{H-NMR}$  ( $\text{CDCl}_3$ , 400 MHz)  $\delta$  (ppm): 1.91 (s, 3H), 2.26 (s, 3H), 3.50 (s, 1H), 3.76 (s, 3H), 5.50 (s, 1H), 7.28-7.34 (m, 4H), 7.47 (d,  $J = 8.8$

Hz, 2H), 7.54-7.61 (m, 2H), 7.71-7.79 (m, 2H), 8.22 (d,  $J = 8.8$  Hz, 2H);  $^{13}\text{C}$ -NMR ( $\text{CDCl}_3$ , 100 MHz)  $\delta$  (ppm): 20.50, 20.58, 53.51, 64.95, 76.38, 121.75, 122.50, 124.01, 127.49, 127.68, 128.57, 128.74, 128.91, 128.97, 129.44, 132.26, 133.00, 134.12, 138.99, 139.36, 140.47, 147.79, 147.89, 167.50, 168.69, 172.07; Enantiomeric excess: 95%, determined by HPLC (Daicel Chirapak OD-H, hexane/ isopropanol = 85/ 15, flow rate 1.0 mL/min,  $T = 30$  °C, 254 nm):  $t_{\text{R}} = 11.80$  min(minor),  $t_{\text{R}} = 19.34$  min(major); IR (KBr):  $\gamma$  3357, 3074, 2953, 2856, 2360, 2342, 1770, 1734, 1521, 1490, 1348, 1195, 1168, 1091, 1029, 1013, 829, 769,  $591\text{ cm}^{-1}$ ; HRMS: exact mass calcd for  $(\text{C}_{30}\text{H}_{23}\text{ClN}_2\text{O}_8+\text{H})^+$  requires  $m/z$  575.1221, found  $m/z$  575.1224.

**1-(2-Chlorophenyl)-1-(methoxycarbonyl)-3-(4-nitrophenyl)-2,3-dihydro-1H-benzo[f]isoindole-4,9-diyl diacetate (5u):** Yield: 79%;  $[\alpha]_{\text{D}}^{20} = +127.3$  (c 0.9,  $\text{CHCl}_3$ );  $^1\text{H}$ -NMR ( $\text{CDCl}_3$ , 400 MHz)  $\delta$  (ppm): 1.90 (s, 3H), 2.28 (s, 3H), 3.81 (s, 3H), 5.43 (s, 1H), 6.94 (d,  $J = 8.0$  Hz, 1H), 7.11-7.16 (m, 1H), 7.26-7.30 (m, 1H), 7.47 (d,  $J = 8.0$  Hz, 1H), 7.57-7.62 (m, 4H), 7.74-7.79 (m, 2H), 8.23 (d,  $J = 8.8$  Hz, 2H);  $^{13}\text{C}$ -NMR ( $\text{CDCl}_3$ , 100 MHz)  $\delta$  (ppm): 20.10, 20.66, 53.82, 64.87, 77.30, 121.73, 122.48, 123.92, 126.70, 127.57, 127.88, 128.59, 128.98, 129.11, 129.45, 129.98, 131.03, 133.51, 133.98, 139.57, 141.02, 147.92, 148.34, 167.48, 172.01; Enantiomeric excess: 85%, determined by HPLC (Daicel Chirapak OD-H, hexane/ isopropanol = 90/ 10, flow rate 1.0 mL/min,  $T = 30$  °C, 254 nm):  $t_{\text{R}} = 13.82$  min(minor),  $t_{\text{R}} = 17.58$  min(major); IR (KBr):  $\gamma$  3353, 2972, 2922, 2355, 2330, 1770, 1732, 1520, 1348, 1195, 1169, 1090, 1049, 881,  $760\text{ cm}^{-1}$ ; HRMS: exact mass calcd for  $(\text{C}_{30}\text{H}_{23}\text{ClN}_2\text{O}_8+\text{H})^+$  requires  $m/z$  575.1221, found  $m/z$  575.1223.

**1-(4-Chlorophenyl)-1-(methoxycarbonyl)-3-(4-nitrophenyl)isoindoline-4,7-diyl diacetate (5v):** Yield: 76%; m.p. 177-179 °C;  $[\alpha]_{\text{D}}^{20} = -21.3$  (c 0.8,  $\text{CHCl}_3$ );  $^1\text{H}$ -NMR ( $\text{CDCl}_3$ , 400 MHz)  $\delta$  (ppm): 1.81 (s, 3H), 2.06 (s, 3H), 3.34 (s, 1H), 3.76 (s, 3H), 5.57 (s, 1H), 7.13 (d,  $J = 8.7$  Hz, 1H), 7.18 (d,  $J = 8.7$  Hz, 1H), 7.24 (d,  $J = 8.8$  Hz, 2H), 7.31 (d,  $J = 8.8$  Hz, 2H), 7.39 (d,  $J = 8.8$  Hz, 2H), 8.19 (d,  $J = 8.8$  Hz, 2H);  $^{13}\text{C}$ -NMR ( $\text{CDCl}_3$ , 100 MHz)  $\delta$  (ppm): 20.27, 20.71, 53.35, 65.27, 76.69, 124.00, 124.24, 124.94, 128.45, 128.59, 128.97, 134.08, 135.26, 136.53, 139.61, 143.30, 143.99, 147.80, 148.40, 167.83, 168.49, 172.48; Enantiomeric excess: 86%, determined by HPLC (Daicel Chirapak OD-H, hexane/ isopropanol = 70/ 30, flow rate 1.0 mL/min,  $T = 25$  °C, 254 nm):  $t_{\text{R}} = 9.04$  min(minor),  $t_{\text{R}} = 11.67$  min(major); IR (KBr):  $\gamma$  3436, 2922, 2852, 1766, 1738, 1520, 1485, 1348, 1178, 1014, 872, 593,  $567\text{ cm}^{-1}$ ; HRMS: exact mass calcd for  $(\text{C}_{26}\text{H}_{21}\text{ClN}_2\text{O}_8+\text{H})^+$  requires  $m/z$  525.1065, found  $m/z$  525.1072; Anal. Calcd for  $\text{C}_{26}\text{H}_{21}\text{ClN}_2\text{O}_8$ : C, 59.49; H, 4.03; N, 5.34. Found: C, 59.51; H, 4.19; N,

4.93.

**Diethyl 3-(4-chlorophenyl)-4,7-bis(trifluoromethylsulfonyloxy)isoindoline-1,1-dicarboxylate (7):** **4p** (partially isomerized) was transferred to a test tube. The atmosphere was replaced with argon and pyridine (2 mL) was added. The test tube was placed in an ice-water bath, and then Tf<sub>2</sub>O (0.30 mL) was added. The reaction mixture was allowed to warm up to room temperature and stirred overnight. The reaction was quenched with water (10 mL) and the aqueous layer was extracted with CH<sub>2</sub>Cl<sub>2</sub>. The combined organic layers were washed with 1 N HCl and saturated NaCl aqueous solution. After removal of the solvent, the residue was purified through column chromatography on a silica gel (eluent: petroleum ether/ethyl acetate = 25/1) to give pure product **7** (97.6 mg, 73%); [ $\alpha$ ]<sub>D</sub><sup>20</sup> = -32.0 (c 1.6, CHCl<sub>3</sub>); <sup>1</sup>H-NMR (CDCl<sub>3</sub>, 400 MHz)  $\delta$  (ppm): 1.28-1.33 (m, 6H), 3.93 (d, *J* = 5.3 Hz, 1H), 4.24-4.43 (m, 4H), 5.77 (d, *J* = 5.3 Hz, 1H), 7.21 (d, *J* = 6.6 Hz, 2H), 7.29-7.34 (m, 3H), 7.42 (d, *J* = 9.1 Hz, 1H); <sup>13</sup>C-NMR (CDCl<sub>3</sub>, 100 MHz)  $\delta$  (ppm): 13.80, 13.83, 63.22, 63.56, 65.58, 76.88, 118.35 (q, *J*<sub>C-F</sub> = 319 Hz), 118.40 (q, *J*<sub>C-F</sub> = 318 Hz), 122.24, 124.41, 128.99, 129.67, 132.70, 134.60, 138.71, 140.28, 142.91, 145.01, 167.93, 168.65; Enantiomeric excess: 93%, determined by HPLC (Daicel Chirapak AD-H, hexane/ isopropanol = 90/ 10, flow rate 1.0 mL/min, T = 25 °C, 254 nm): t<sub>R</sub> = 6.42 min(minor), t<sub>R</sub> = 8.80 min(major); IR (KBr):  $\nu$  3427, 2922, 2852, 1740, 1637, 1478, 1430, 1222, 1140, 1091, 930, 880, 602 cm<sup>-1</sup>; HRMS: exact mass calcd for (C<sub>22</sub>H<sub>18</sub>ClF<sub>6</sub>NO<sub>10</sub>S<sub>2</sub>+H)<sup>+</sup> requires m/z 670.0043, found m/z 670.0046.

**Diethyl 3-(4-chlorophenyl)isoindoline-1,1-dicarboxylate (8):** To a dry test tube was added **7** (82.9 mg, 0.12 mmol), Pd(OAc)<sub>2</sub> (9.3 mg, 0.024 mmol) and dppp (2.7 mg, 0.012 mmol). The atmosphere was replaced with argon and DMF (1.0 ml) was added. The mixture was stirred and was added with Et<sub>3</sub>N (167  $\mu$ L, 1.2 mmol) and HCOOH (36  $\mu$ L, 0.96 mmol). The reaction was heated to 90 °C for 12 hours. Then water (10 mL) was added to the reaction and extracted with ethyl acetate. The organic phase was combined and dried with anhydrous Na<sub>2</sub>SO<sub>4</sub>. After removal of the solvent, the residue was purified through column chromatography on a silica gel (eluent: petroleum ether/ethyl acetate = 20/1) to give **8** (32.1 mg, 69%). [ $\alpha$ ]<sub>D</sub><sup>20</sup> = -113.3 (c 0.4, CHCl<sub>3</sub>); <sup>1</sup>H-NMR (CDCl<sub>3</sub>, 400 MHz)  $\delta$  (ppm): 1.26-1.33 (m, 6H), 3.72 (s, 1H), 4.23-4.35 (m, 4H), 5.62 (s, 1H), 6.88 (d, *J* = 7.7 Hz, 1H), 7.28-7.33 (m, 6H), 7.64 (d, *J* = 7.3 Hz, 1H); <sup>13</sup>C-NMR (CDCl<sub>3</sub>, 100 MHz)  $\delta$  (ppm): 14.11, 14.13, 62.14, 62.42, 66.12, 76.91, 123.29, 125.63, 127.73, 128.75, 129.23, 129.37, 133.48, 135.95, 142.23, 144.35, 169.83, 170.72; Enantiomeric excess: 93%, determined by HPLC (Daicel Chirapak AS-H, hexane/ isopropanol = 90/ 10,

flow rate 1.0 mL/min, T = 25 °C, 254 nm):  $t_R = 7.43$  min(minor),  $t_R = 15.26$  min(major); IR (KBr):  $\gamma$  3438, 2981, 2923, 2852, 1736, 1459, 1258, 1224, 1123, 1088, 881, 748, 643, 603  $\text{cm}^{-1}$ ; HRMS: exact mass calcd for  $(\text{C}_{20}\text{H}_{20}\text{ClNO}_4+\text{H})^+$  requires m/z 374.1159, found m/z 374.1153.

**Reference:**

- [1]. Ficht, S.; Mulbaier, M.; Giannis, A. *Tetrahedron* **2001**, *57*, 4863-4866; Yu, D.; Mattern, D. L. *Syn. Commun.* **1999**, *29*, 821-825.
- [2]. Itoh, K.; Fuchibe, K.; Akiyama, T. *Angew. Chem. Int. Ed.* **2006**, *45*, 4796–4798.

**X-ray single crystal data for 4j (CCDC 704878)**

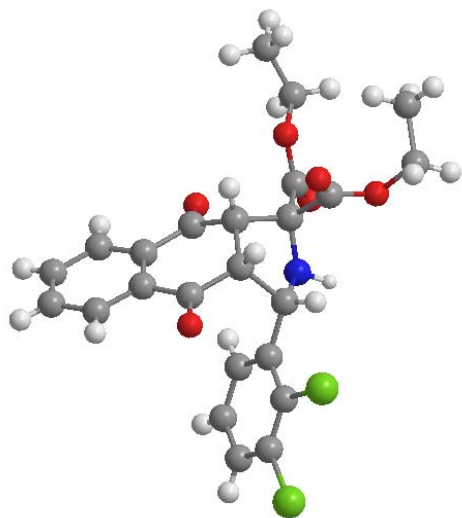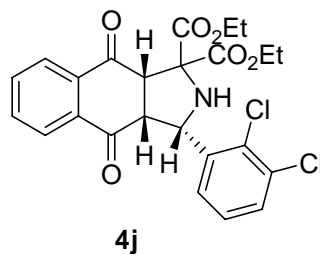

|                            |                                                                  |
|----------------------------|------------------------------------------------------------------|
| Chemical formula           | C <sub>24</sub> H <sub>21</sub> Cl <sub>2</sub> N O <sub>6</sub> |
| Formula weight             | 490.32                                                           |
| Space group                | P 21                                                             |
| Z                          | 2                                                                |
| $\alpha$ , Å               | 8.314(5)                                                         |
| b, Å                       | 22.630(5)                                                        |
| c, Å                       | 12.582(5)                                                        |
| $\alpha$ , °               | 90                                                               |
| $\beta$ , °                | 94.055(5)                                                        |
| $\gamma$ , °               | 90                                                               |
| V, Å <sup>3</sup>          | 2361.3(18)                                                       |
| T, K                       | 293                                                              |
| $\rho$ , g/cm <sup>3</sup> | 1.379                                                            |

Reflections collected / unique: 29413 / 7332 ( $R_{int} = 0.0201$ ), number of observations [ $I > 2 \sigma(I)$ ] 6900, parameters 603. Final  $R$  indices [ $I > 2 \sigma(I)$ ]:  $R_1=0.0571$ ,  $wR_2=0.1429$ ;  $R$  indices (all data):  $R_1=0.0594$ ,  $wR_2=0.1447$ .

### X-ray single crystal data for 5v (CCDC 742913)

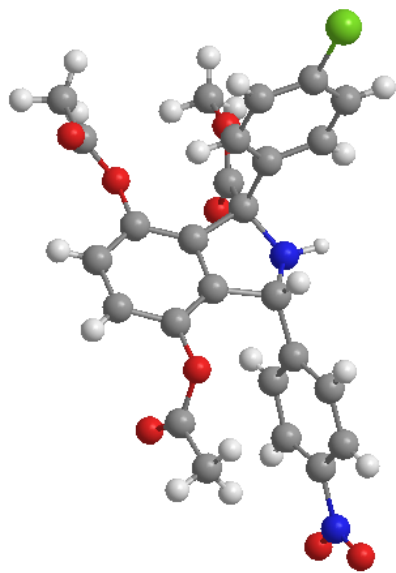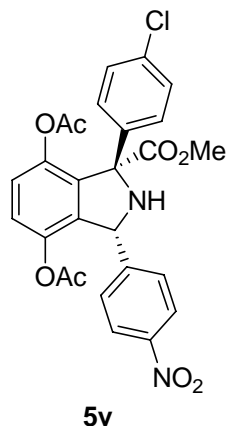

|                            |                                                                  |
|----------------------------|------------------------------------------------------------------|
| Chemical formula           | C <sub>26</sub> H <sub>21</sub> Cl N <sub>2</sub> O <sub>8</sub> |
| Formula weight             | 524.90                                                           |
| Space group                | P 21                                                             |
| Z                          | 2                                                                |
| $\alpha$ , Å               | 7.965(5)                                                         |
| b, Å                       | 30.381(5)                                                        |
| c, Å                       | 10.583(5)                                                        |
| $\alpha$ , °               | 90                                                               |
| $\beta$ , °                | 101.631(5)                                                       |
| $\gamma$ , °               | 90                                                               |
| V, Å <sup>3</sup>          | 2508(2)                                                          |
| T, K                       | 295                                                              |
| $\rho$ , g/cm <sup>3</sup> | 1.390                                                            |

Reflections collected / unique: 14302 / 7313 ( $R_{int} = 0.0289$ ), number of observations [ $I > 2 \sigma(I)$ ] 5182, parameters 676. Final  $R$  indices [ $I > 2 \sigma(I)$ ]:  $R_1=0.0425$ ,  $wR_2=0.0868$ ;  $R$  indices (all data):  $R_1=0.0651$ ,  $wR_2=0.0934$ .

Selected NMR and HPLC

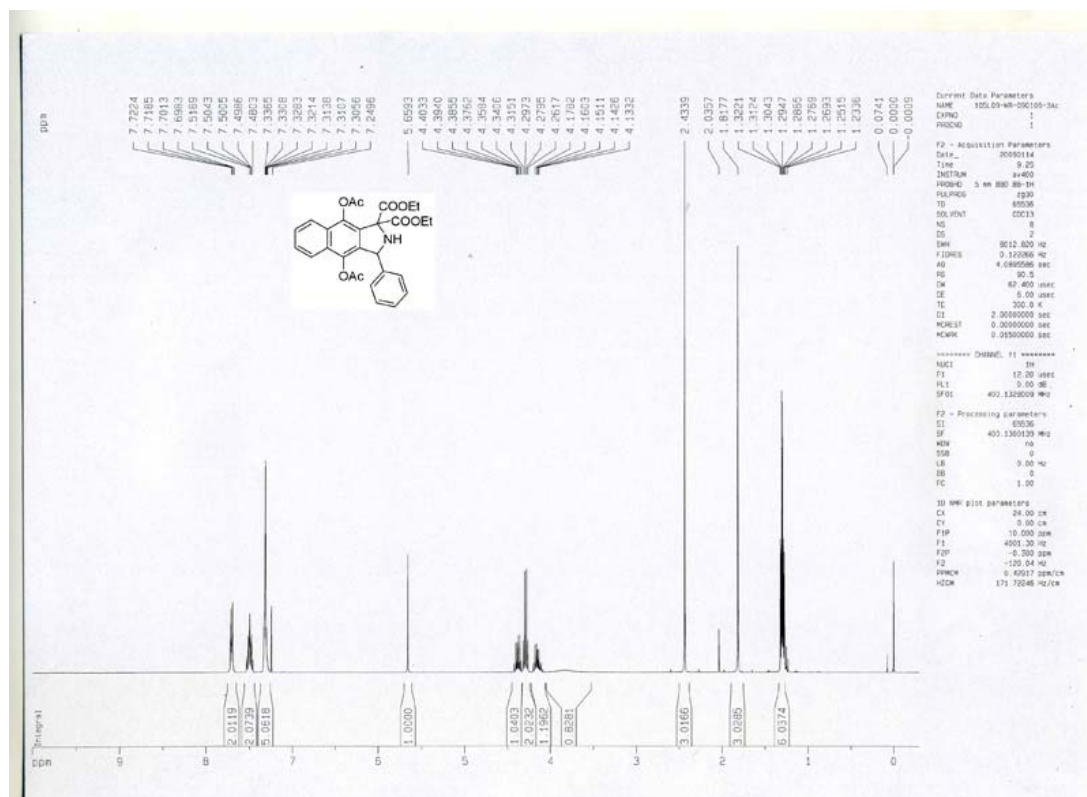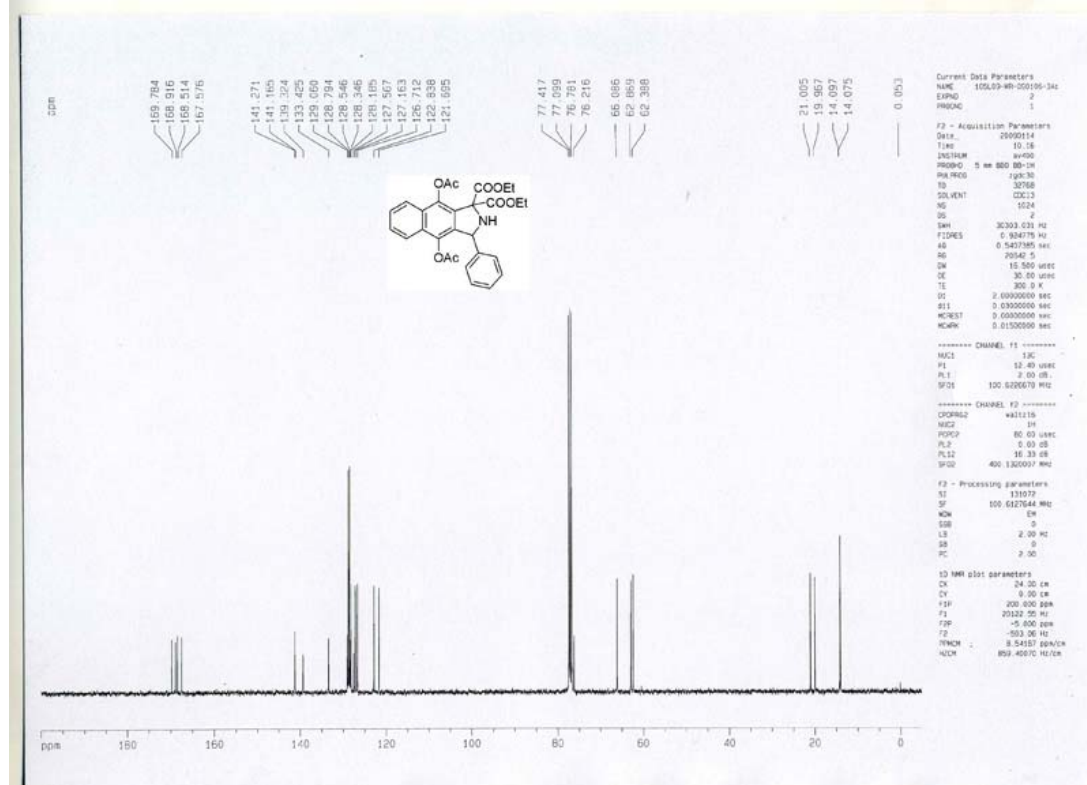

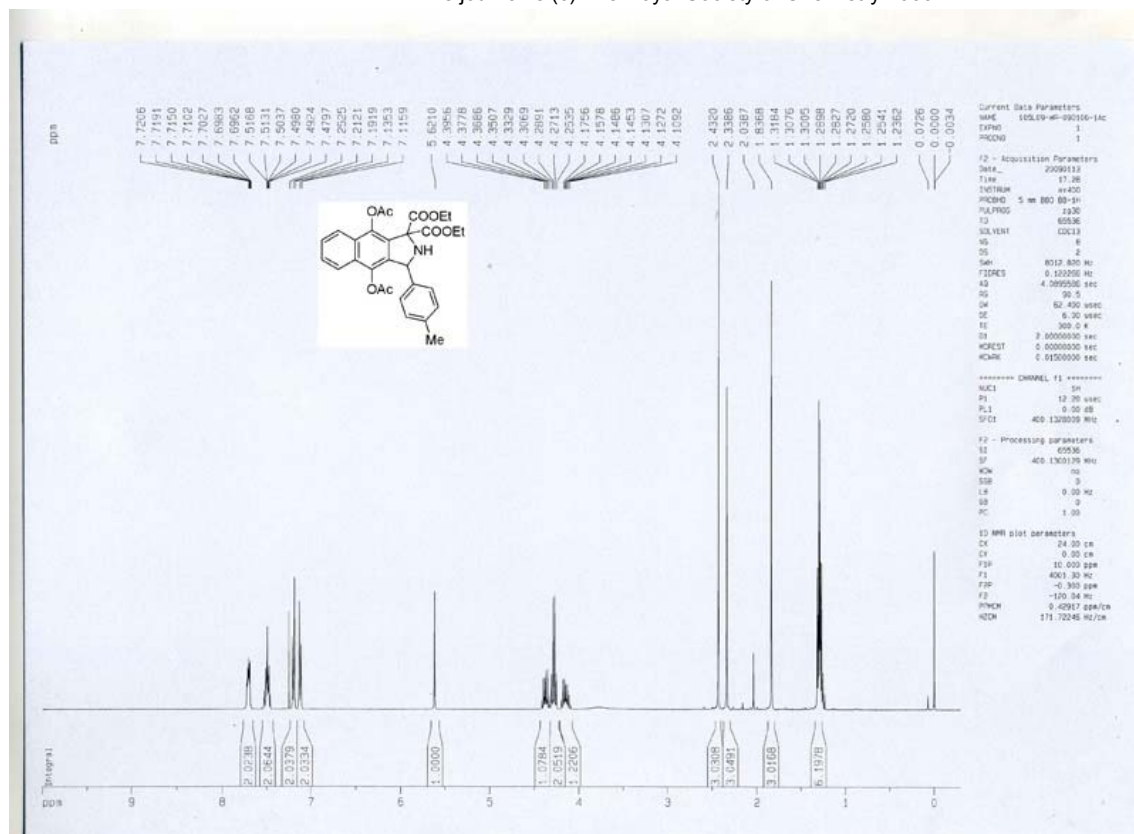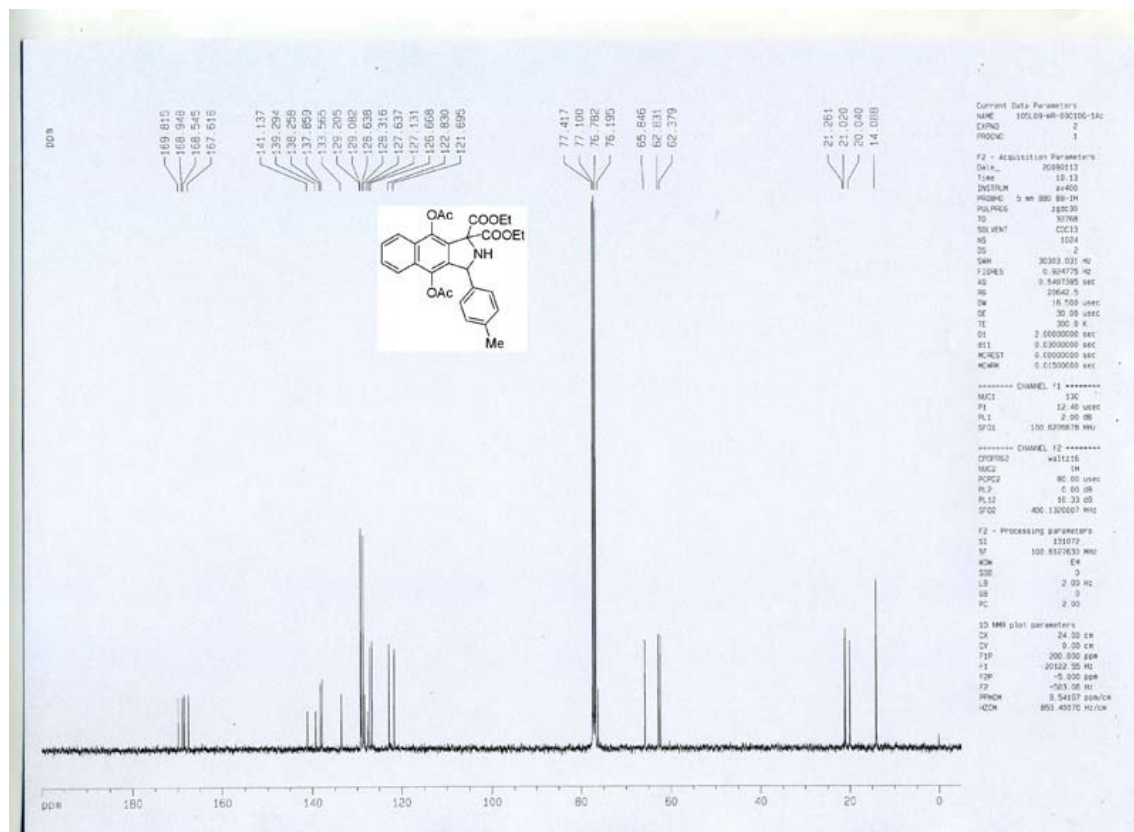



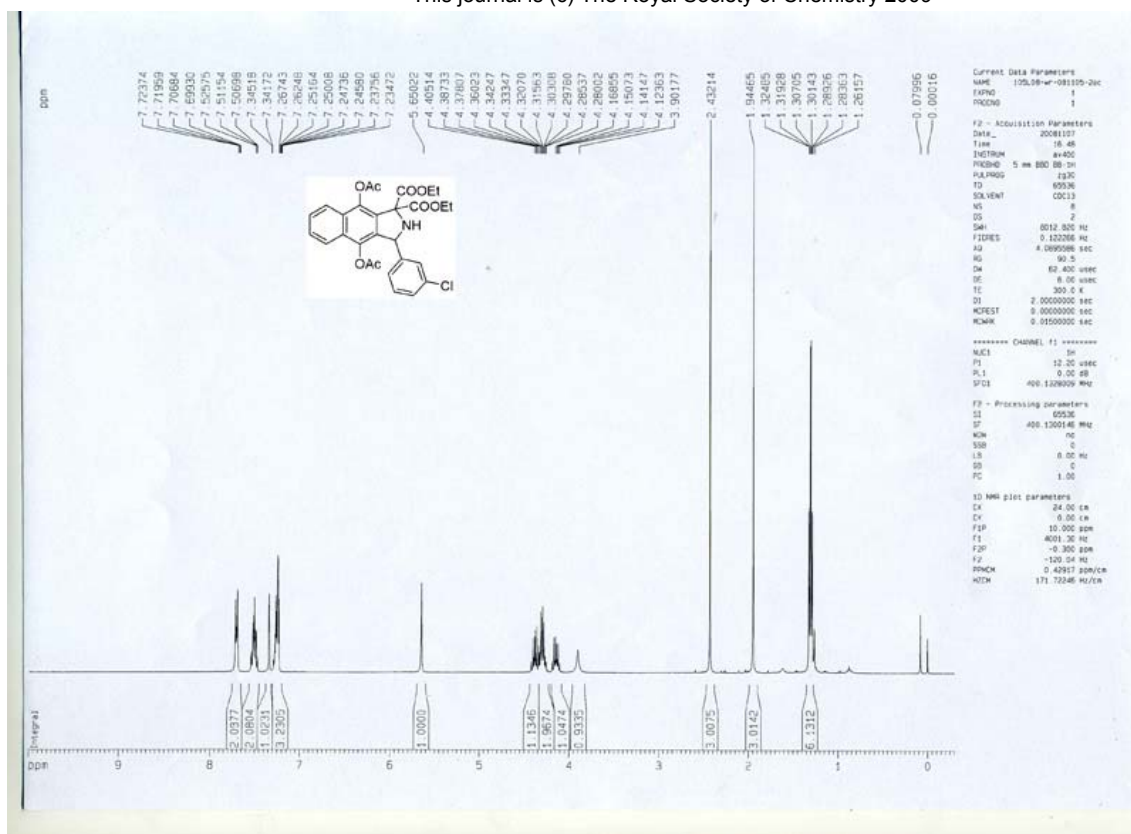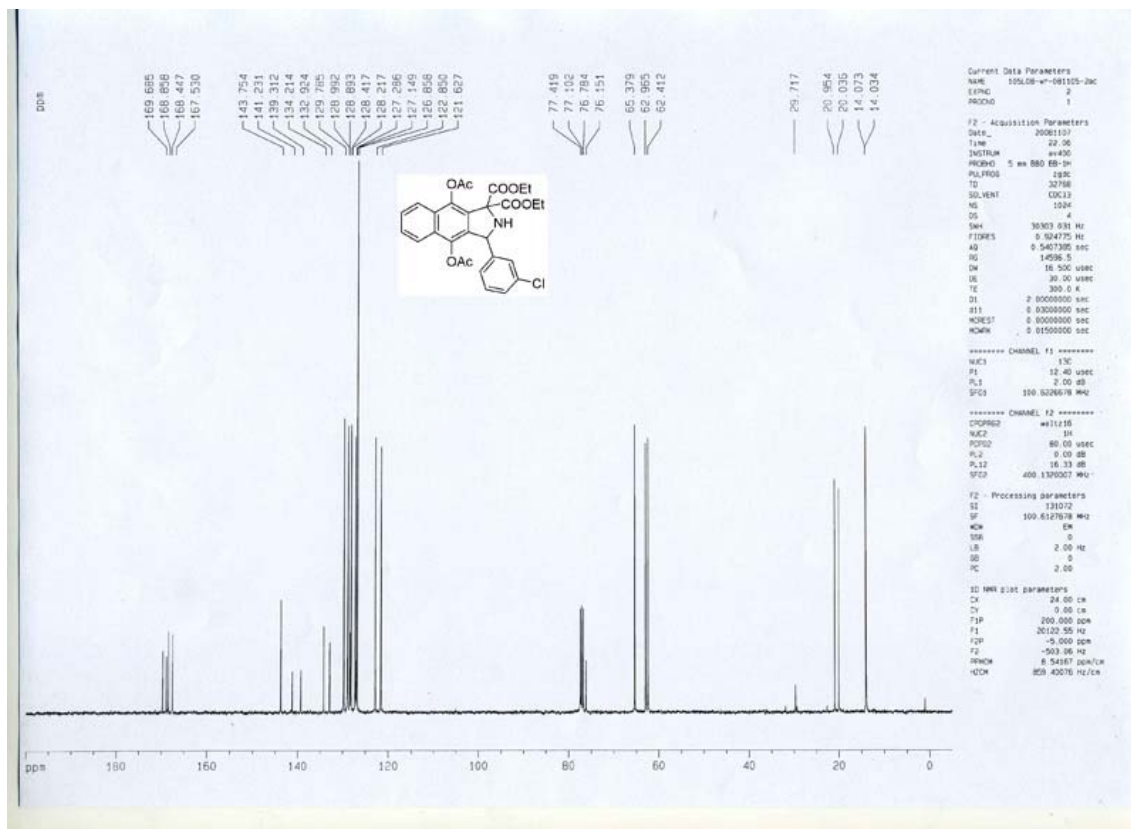

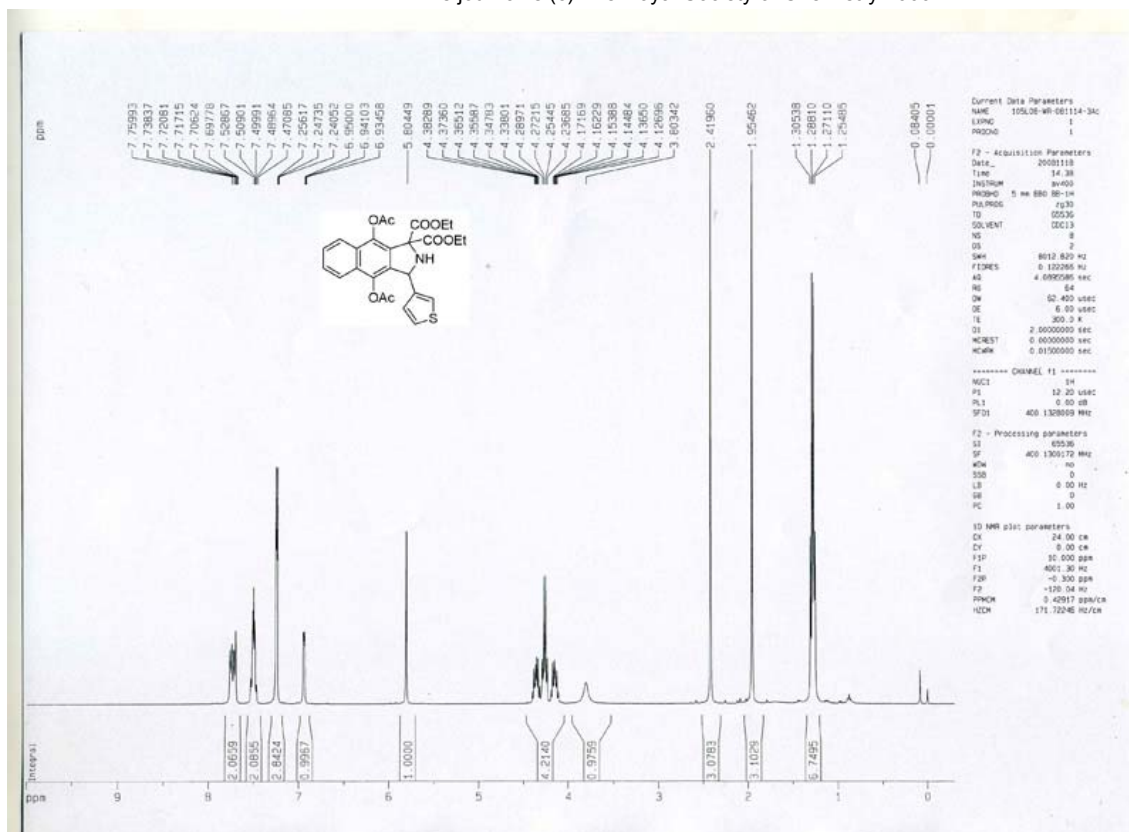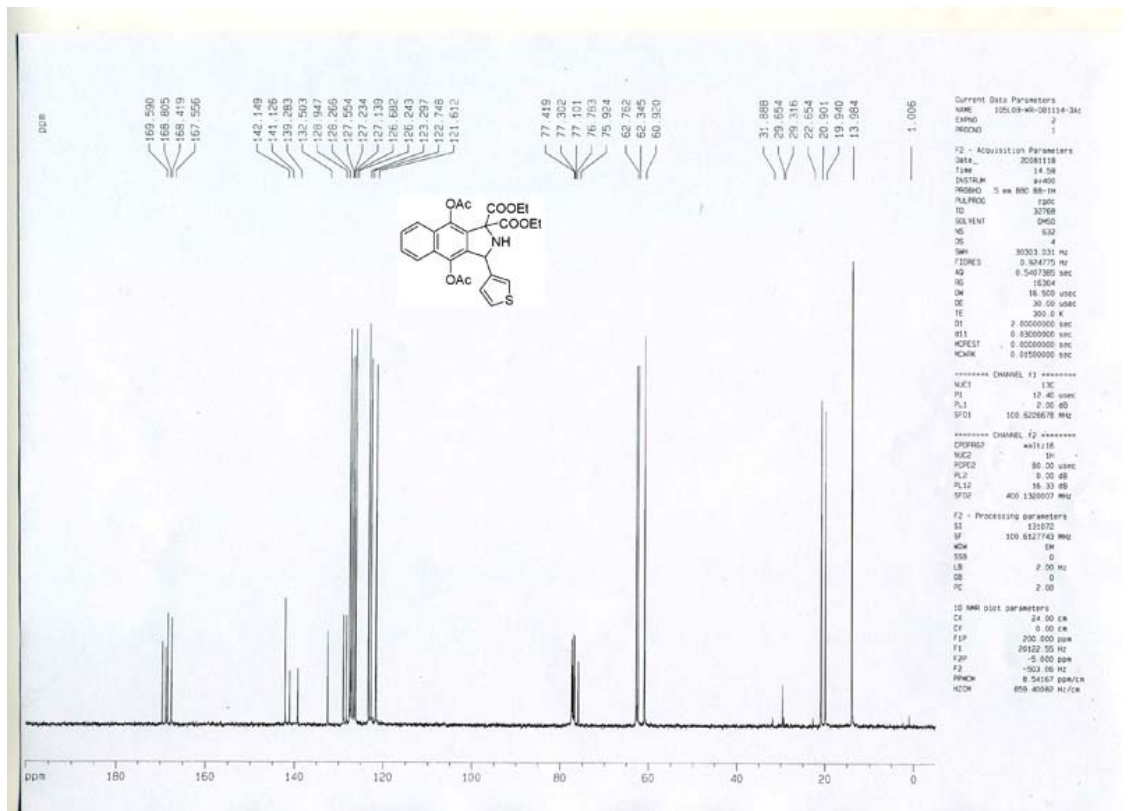

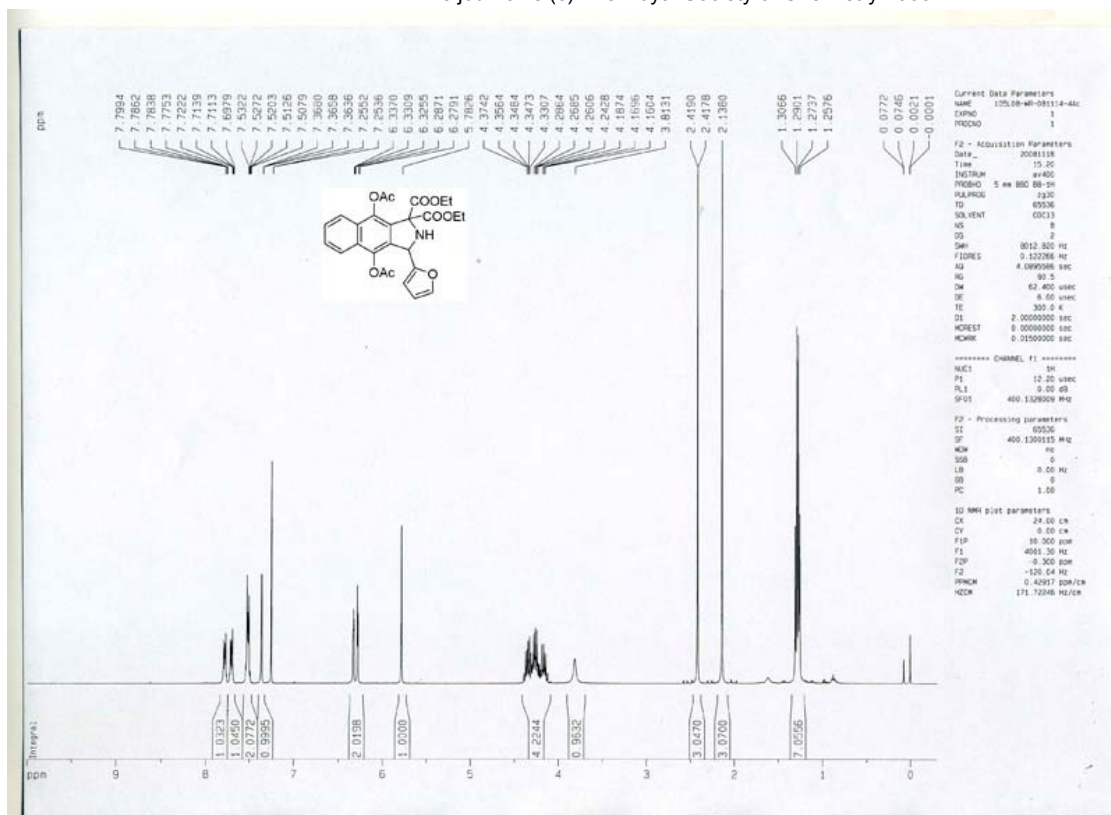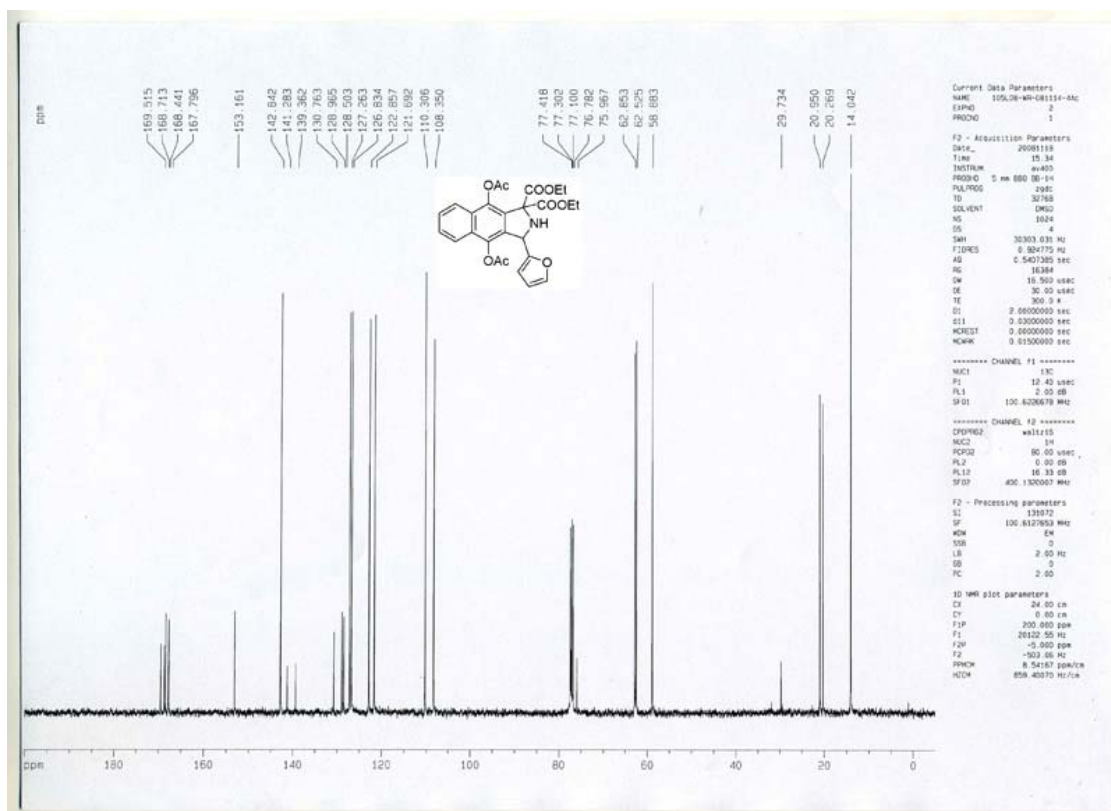

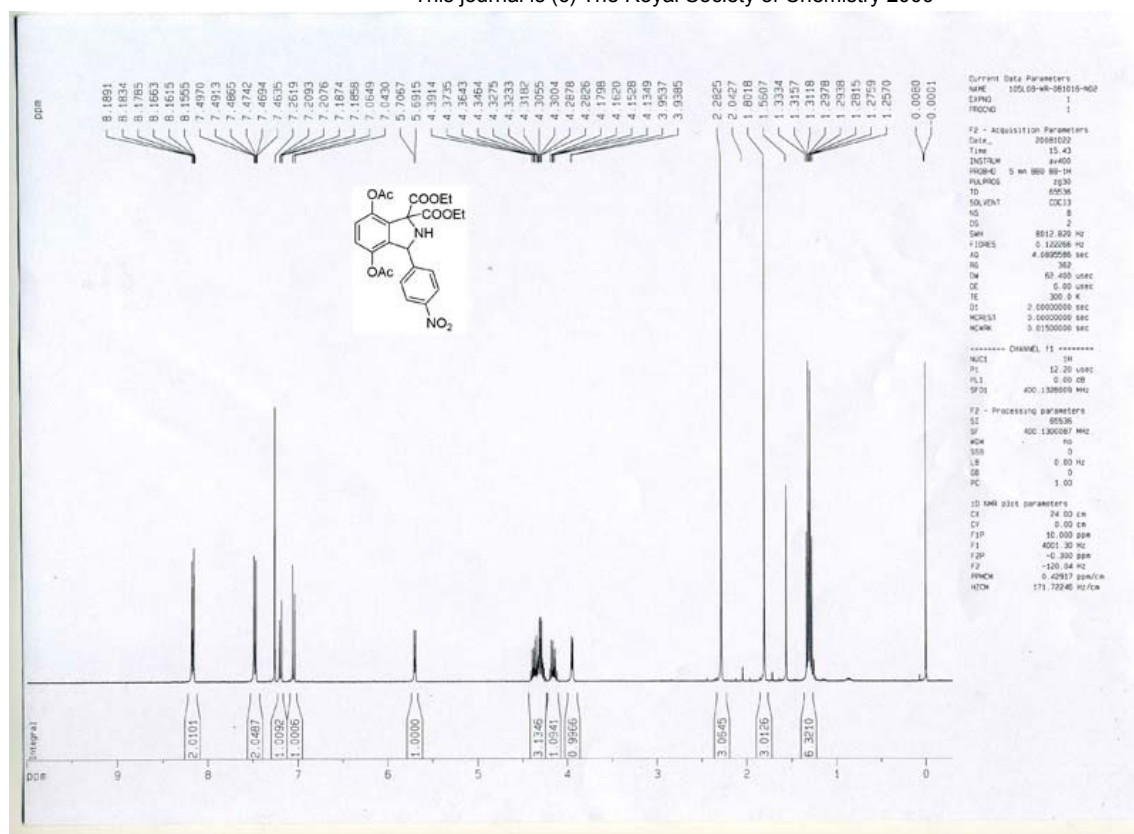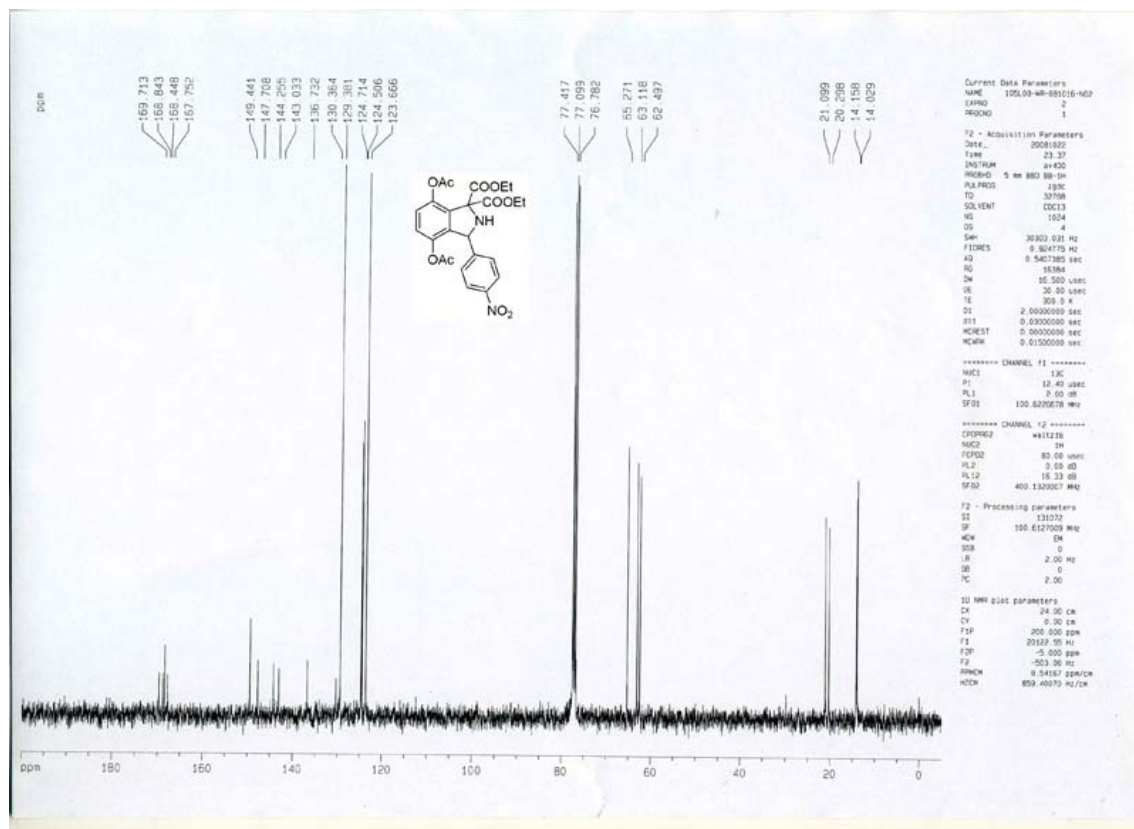



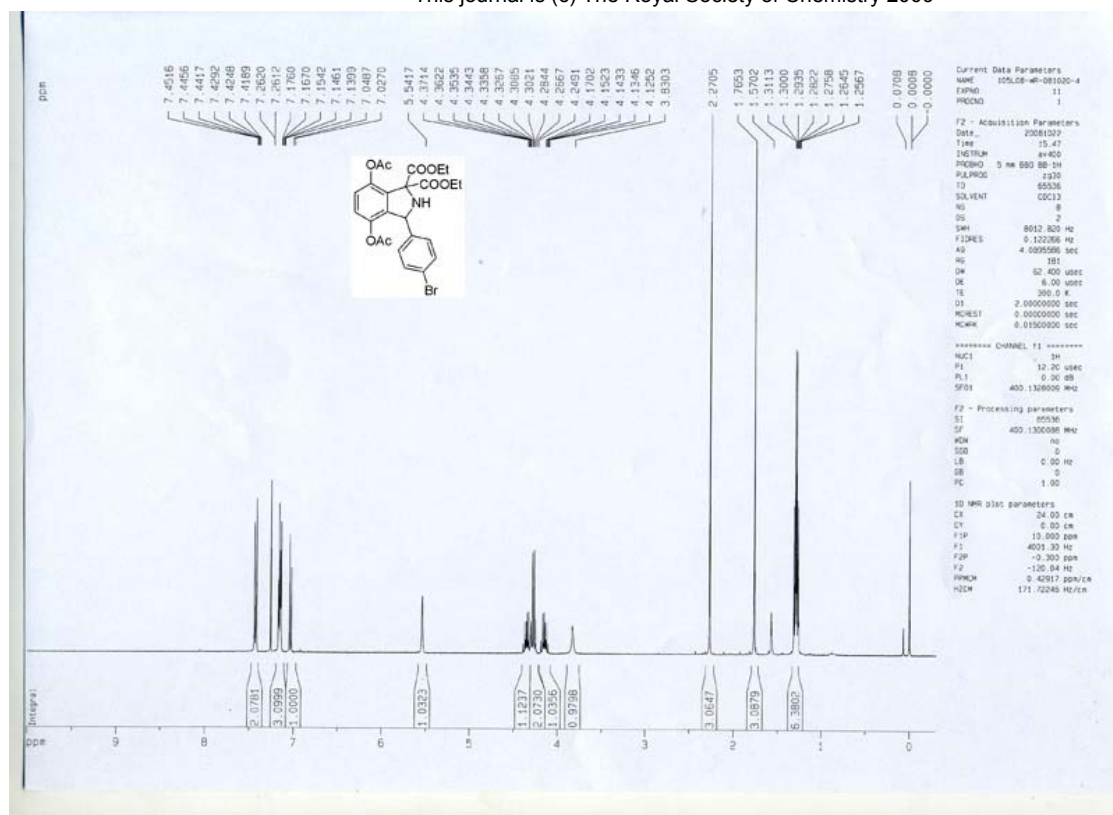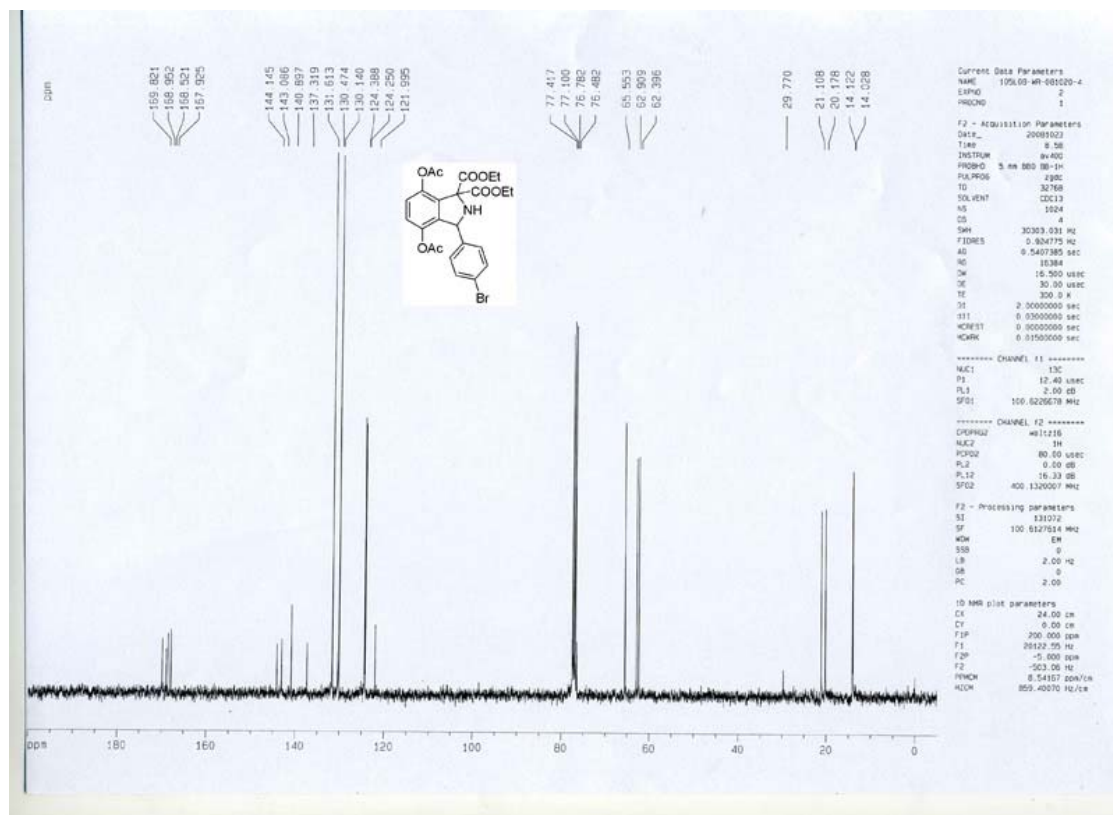

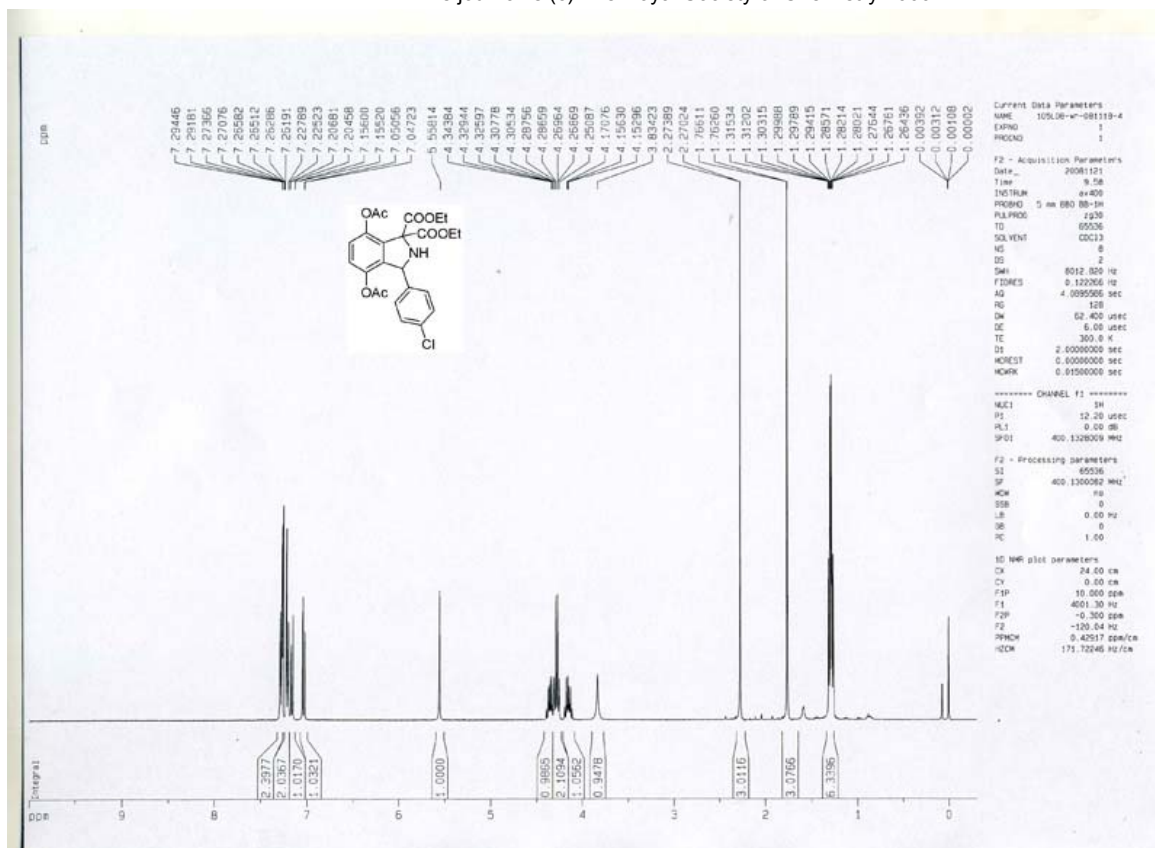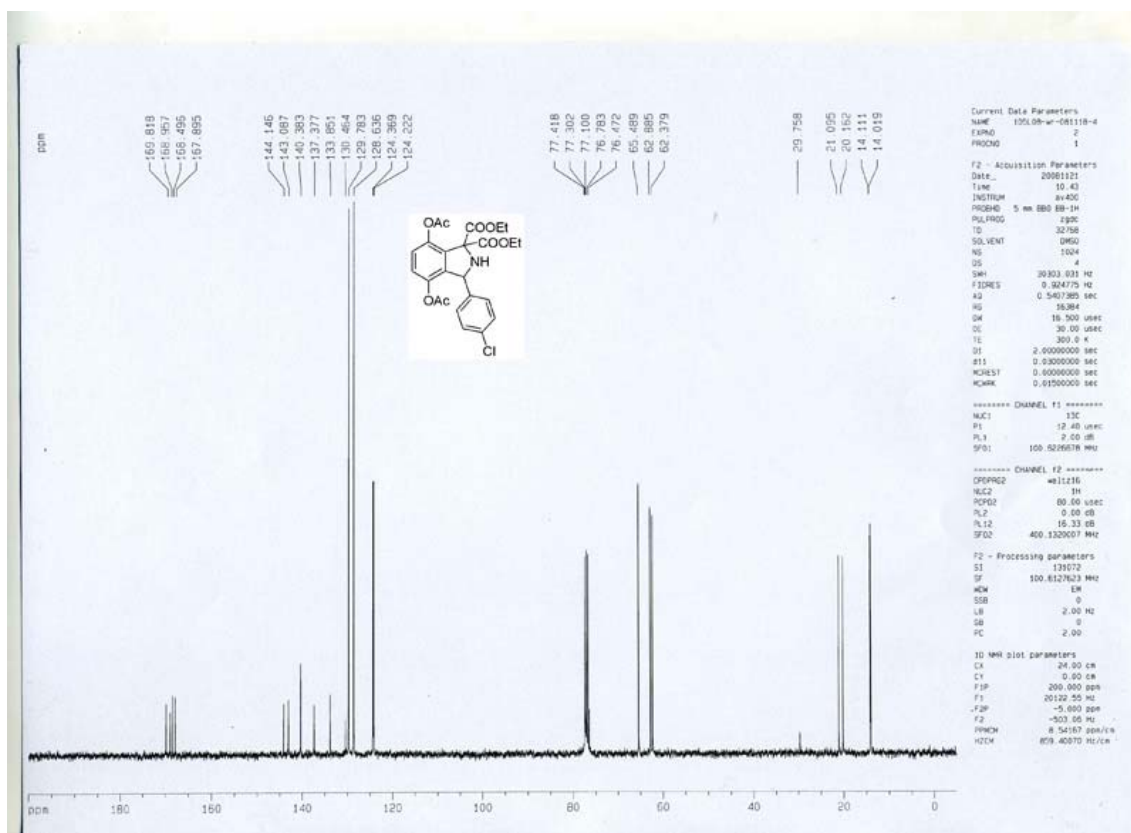

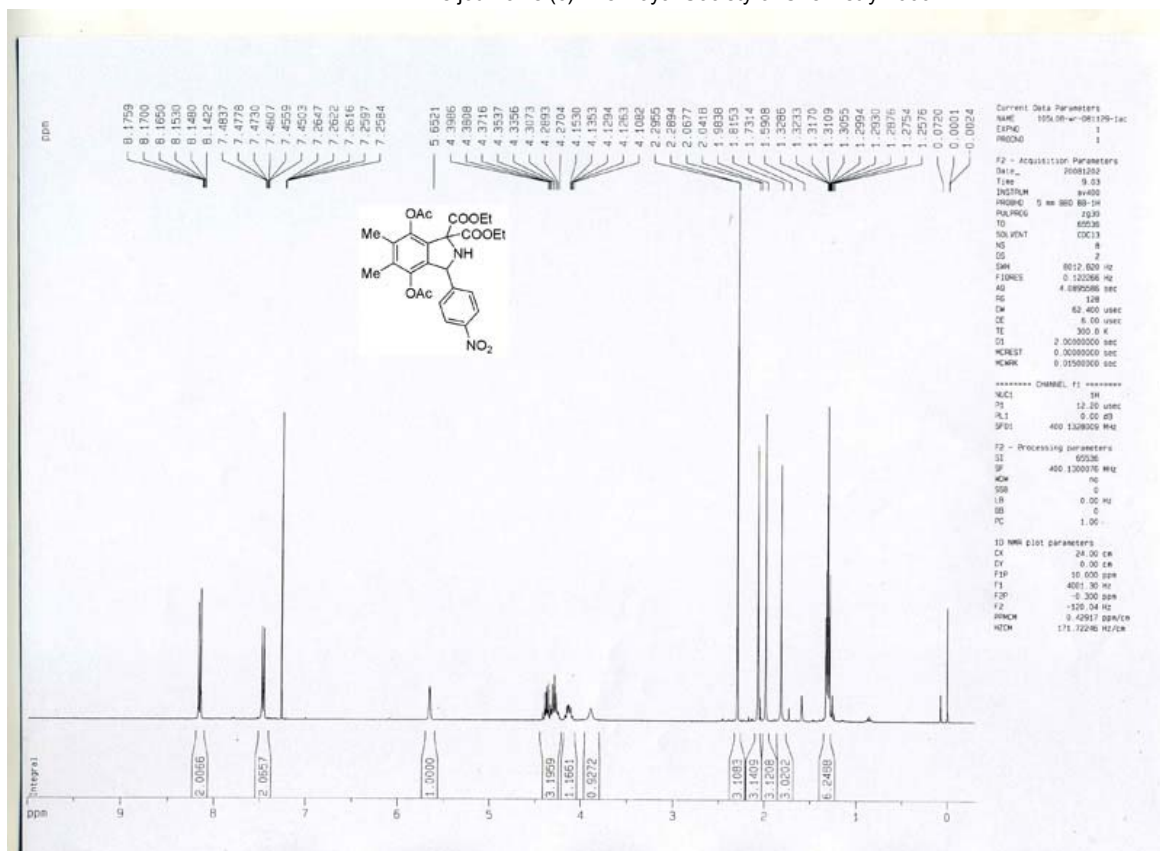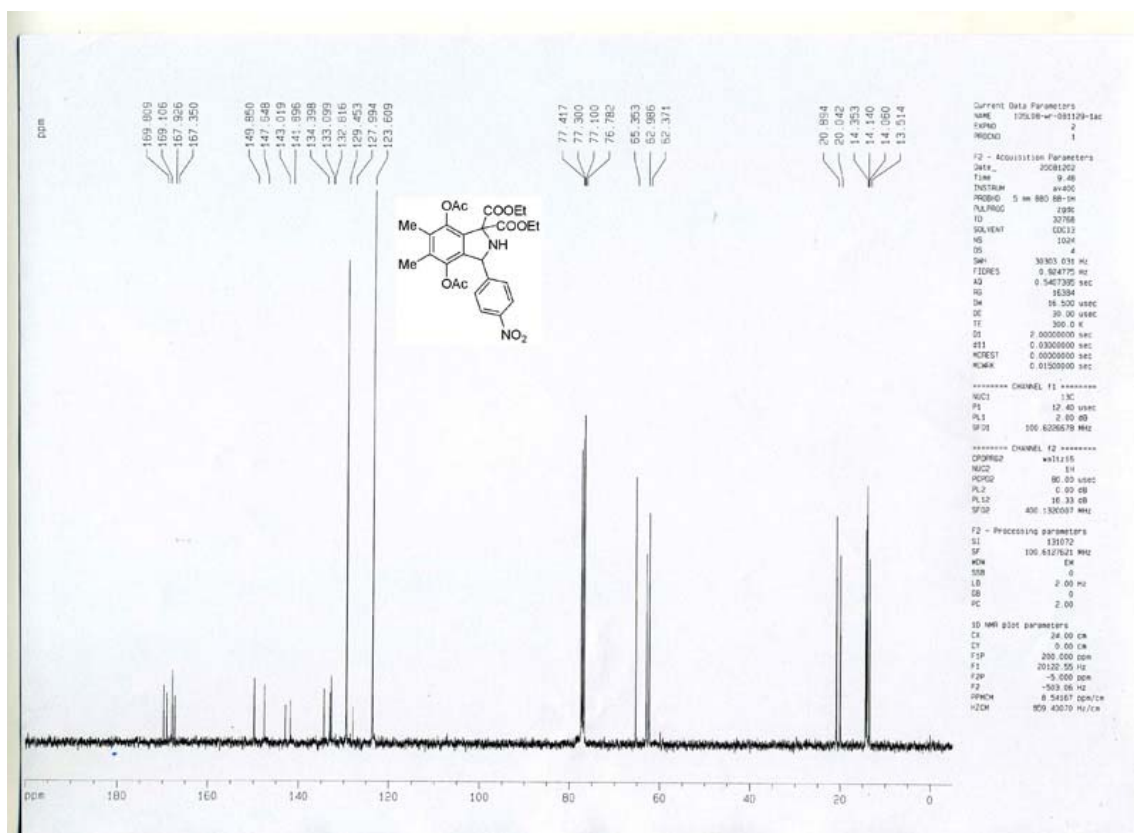

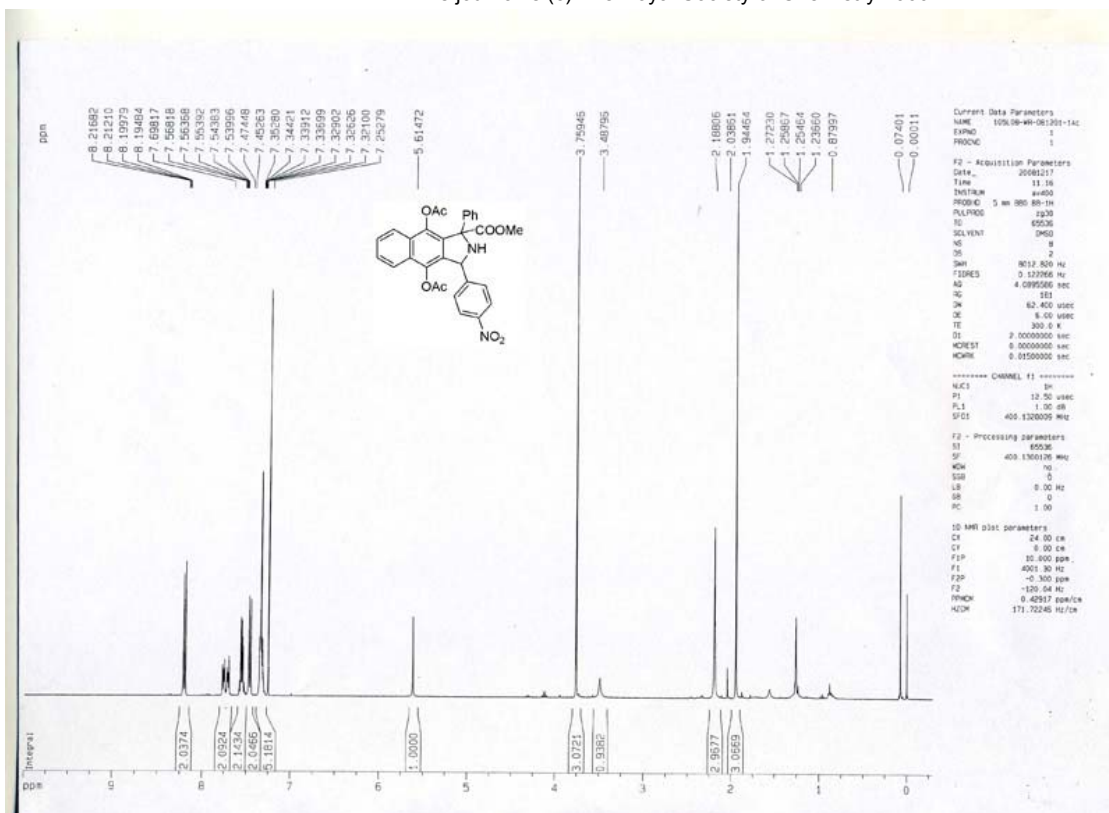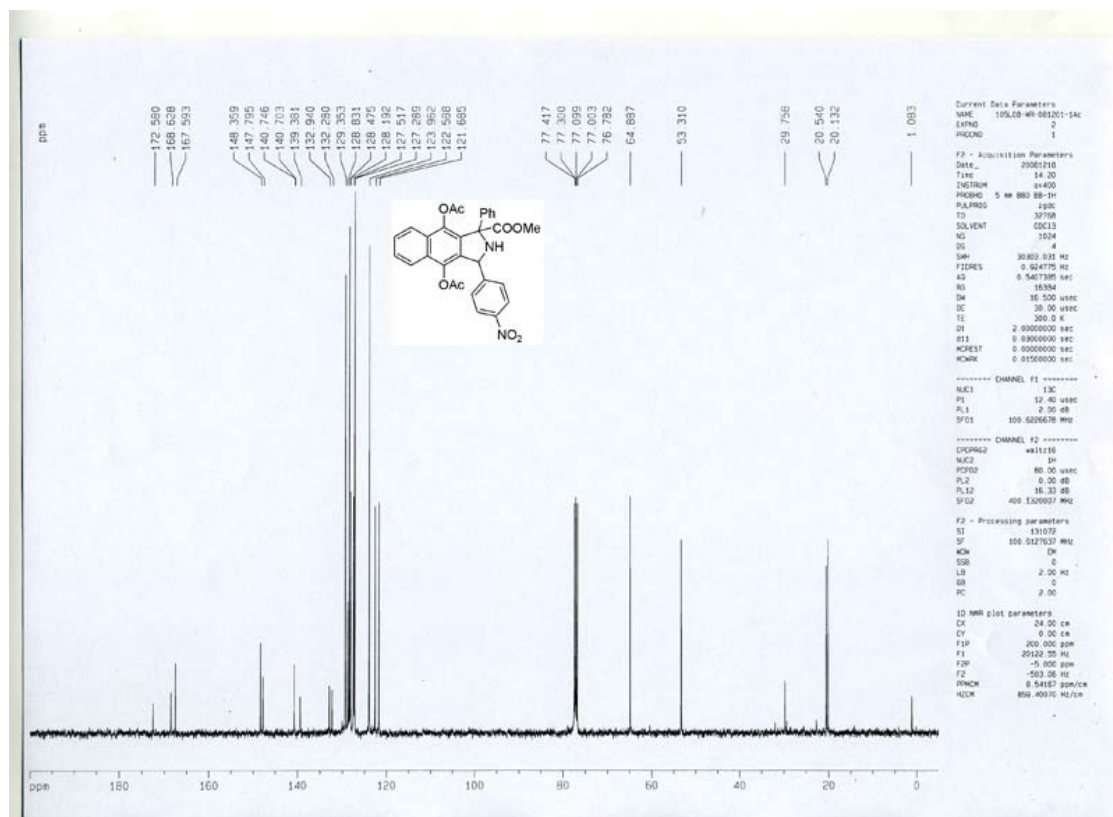



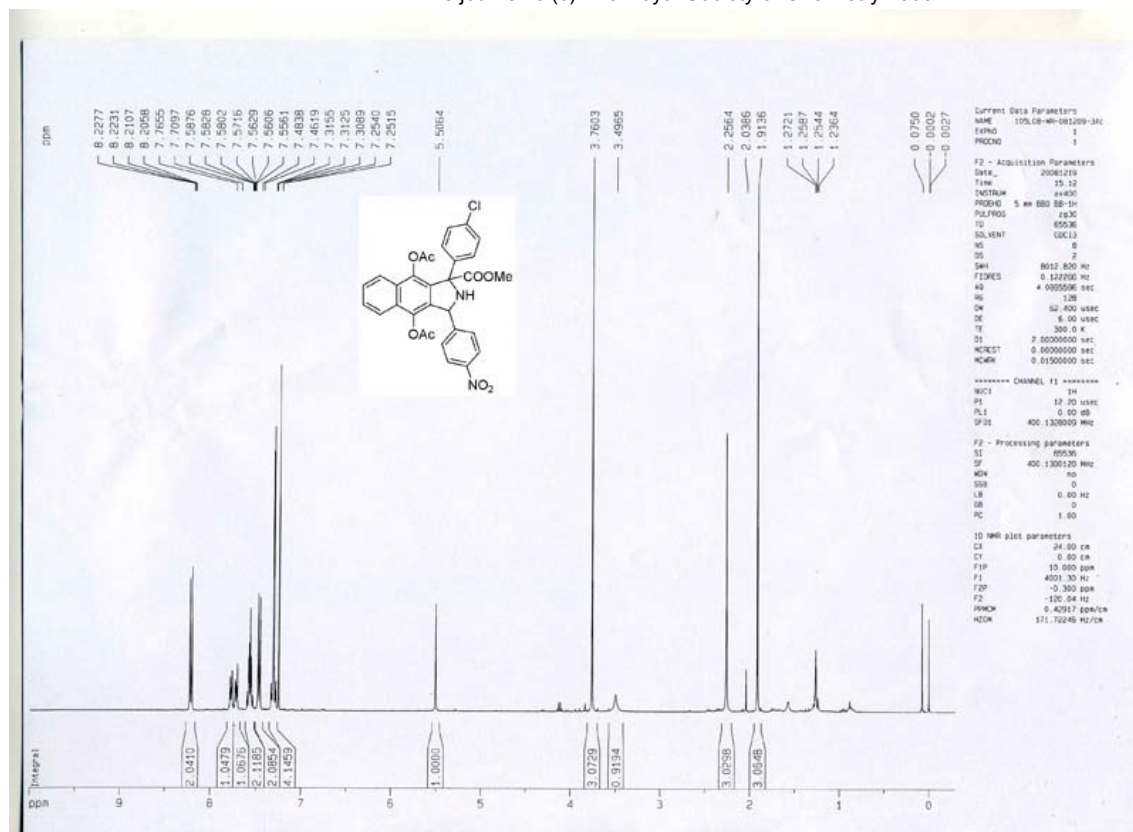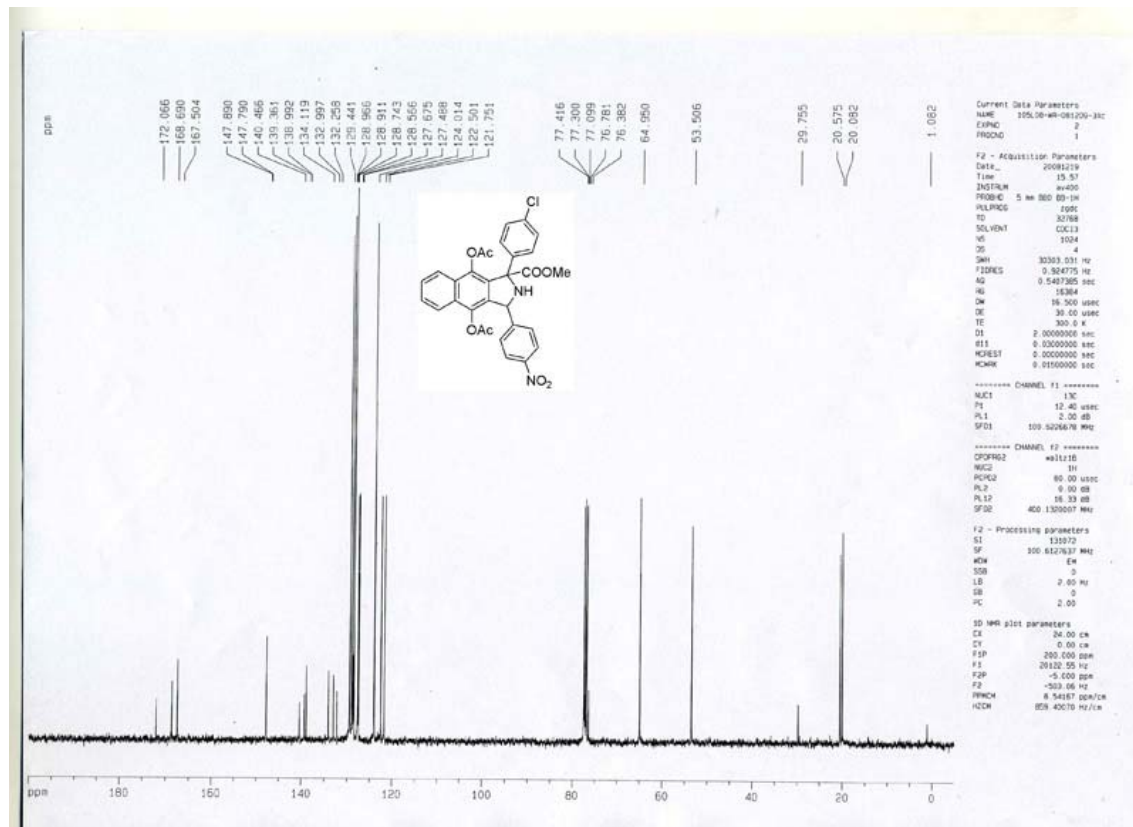

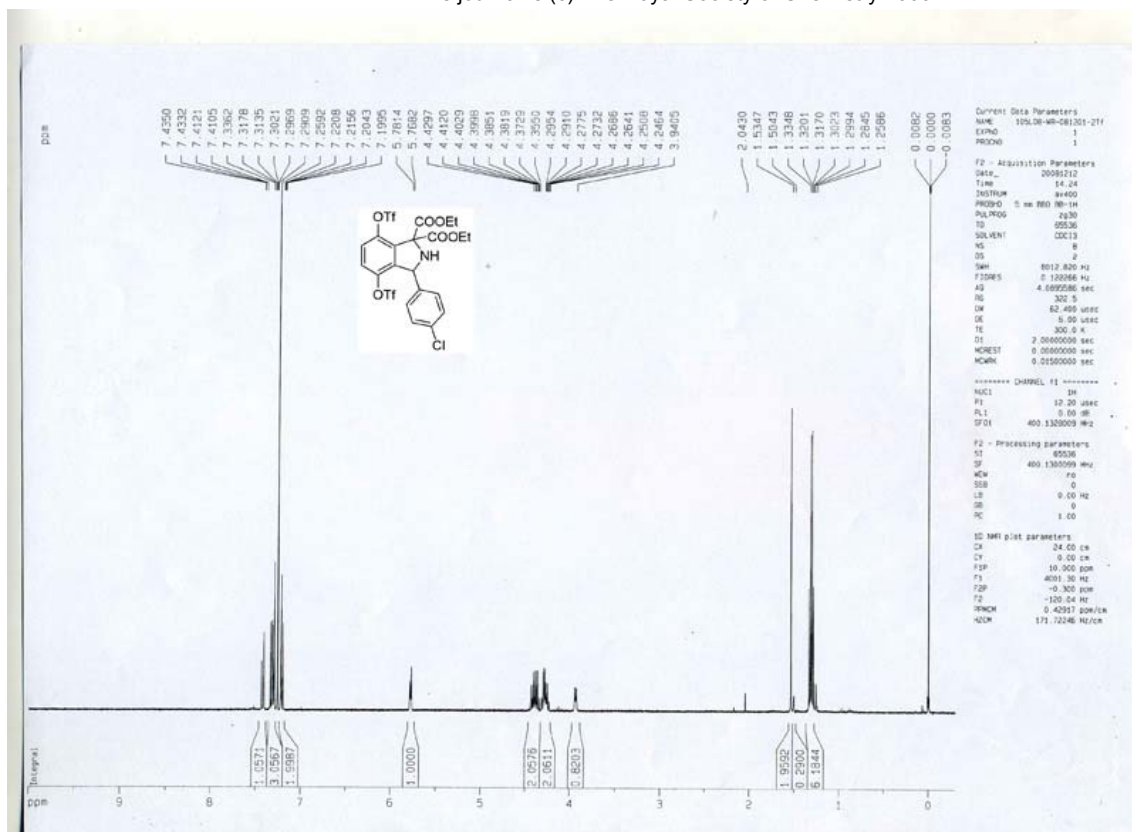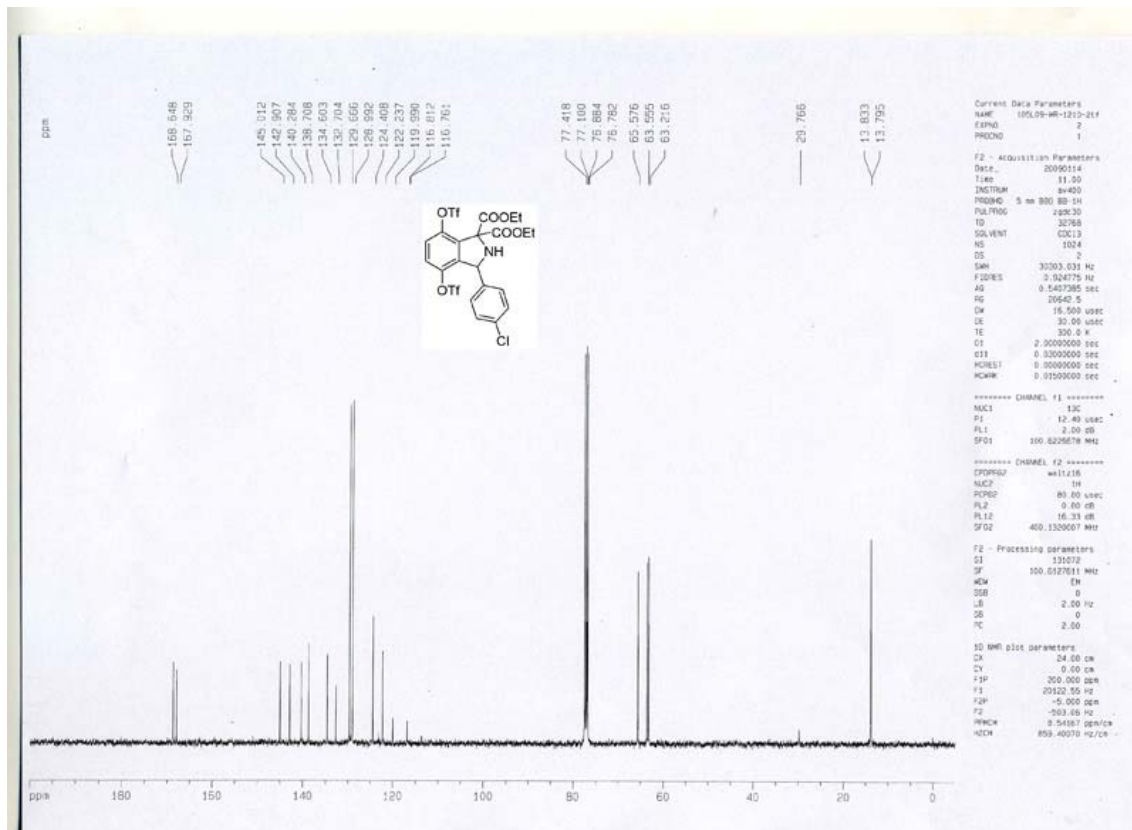

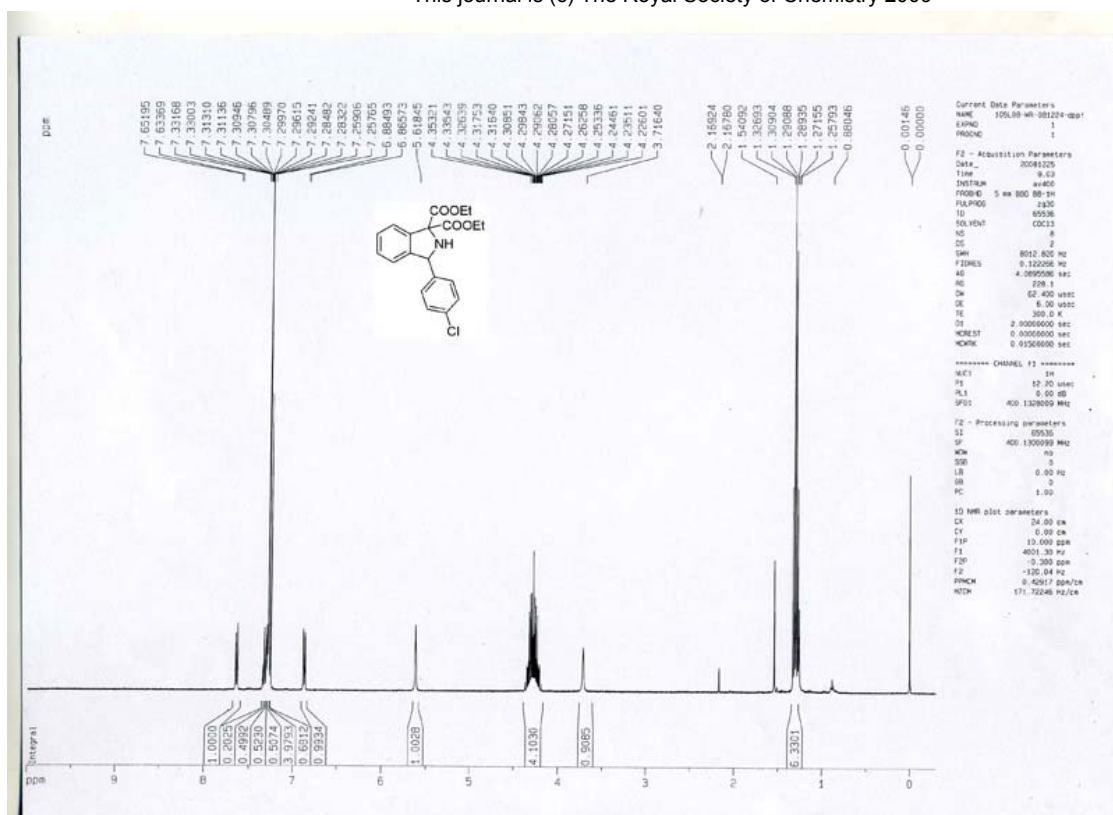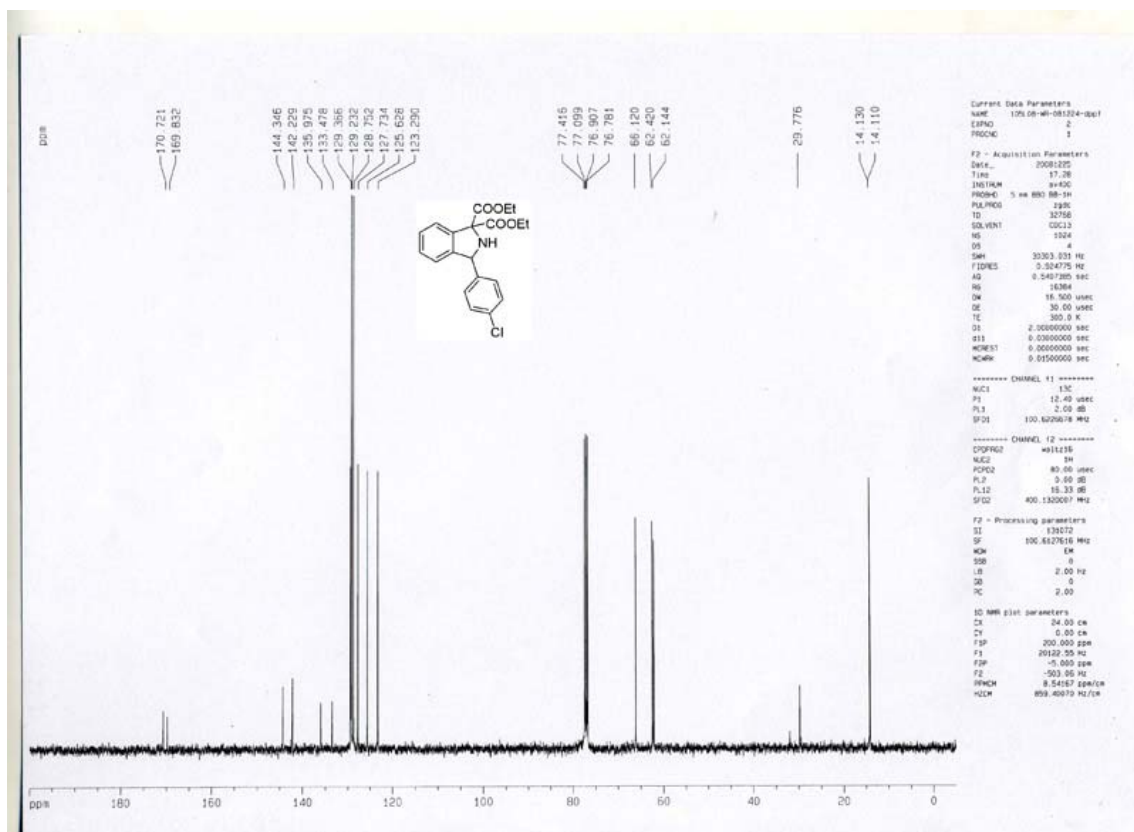

USTC

Project Name: wchao  
 Reported by User: System

*Breeze*

SAMPLE INFORMATION

Sample Name: wr080425-NQ-AD30%  
 Sample Type: Unknown  
 Vial: 1  
 Injection #: 3  
 Injection Volume: 20.00 ul  
 Run Time: 60.00 Minutes  
 Acquired By: System  
 Date Acquired: 4/25/2008 10:12:54 PM  
 Acq. Method: wchao1  
 Date Processed: 4/25/2008 10:50:27 PM  
 Channel Name: 2487Channel 1  
 Sample Set Name:

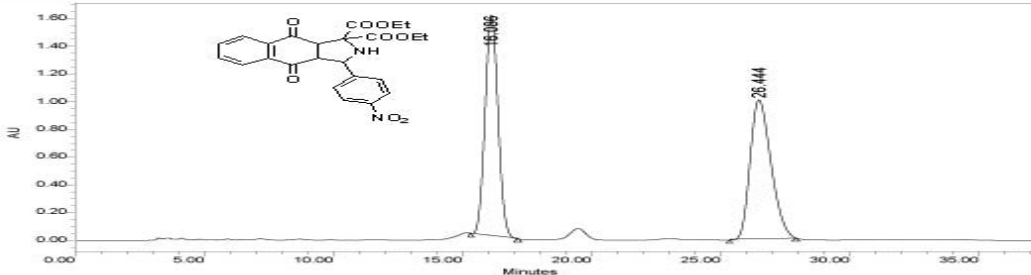

|   | RT (min) | Area (V*sec) | % Area | Height (V) | % Height |
|---|----------|--------------|--------|------------|----------|
| 1 | 16.086   | 55828908     | 49.66  | 1592833    | 61.27    |
| 2 | 26.444   | 56593280     | 50.34  | 1006880    | 38.73    |

USTC

Project Name: wchao  
 Reported by User: System

*Breeze*

SAMPLE INFORMATION

Sample Name: wr080617-3  
 Sample Type: Unknown  
 Vial: 1  
 Injection #: 1  
 Injection Volume: 20.00 ul  
 Run Time: 60.00 Minutes  
 Acquired By: System  
 Date Acquired: 6/19/2008 12:14:50 PM  
 Acq. Method: wchao1  
 Date Processed: 6/19/2008 12:45:01 PM  
 Channel Name: 2487Channel 1  
 Sample Set Name:

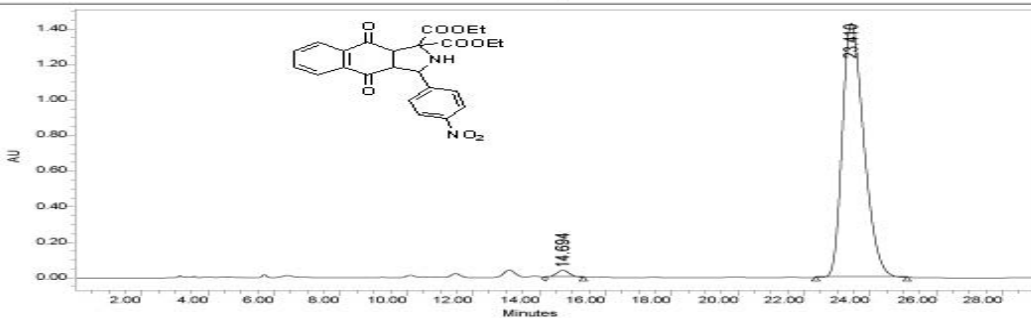

|   | RT (min) | Area (V*sec) | % Area | Height (V) | % Height |
|---|----------|--------------|--------|------------|----------|
| 1 | 14.694   | 1078053      | 1.64   | 39569      | 2.69     |
| 2 | 23.410   | 64592048     | 98.36  | 1431000    | 97.31    |

USTC  
Project Name: wchao  
Reported by User: System

*Breeze*

| SAMPLE INFORMATION |                     |                  |                       |
|--------------------|---------------------|------------------|-----------------------|
| Sample Name:       | wr081107-2-Ac-AD30% | Acquired By:     | System                |
| Sample Type:       | Unknown             | Date Acquired:   | 11/11/2008 6:00:51 PM |
| Vial:              | 1                   | Acq. Method:     | wchao30%430           |
| Injection #:       | 1                   | Date Processed:  | 11/11/2008 6:31:59 PM |
| Injection Volume:  | 20.00 ul            | Channel Name:    | 2487Channel 1         |
| Run Time:          | 100.00 Minutes      | Sample Set Name: |                       |

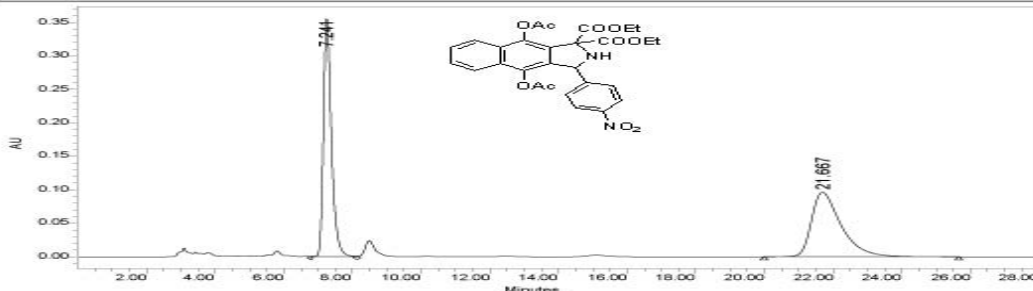

|   | RT (min) | Area (V*sec) | % Area | Height (V) | % Height |
|---|----------|--------------|--------|------------|----------|
| 1 | 7.241    | 5765302      | 49.91  | 355946     | 78.68    |
| 2 | 21.667   | 5785813      | 50.09  | 96476      | 21.32    |

Report Method: Untitled

Printed 11:02:31 PM/15/2009

Page: 1 of 1

USTC  
Project Name: wchao  
Reported by User: System

*Breeze*

| SAMPLE INFORMATION |                     |                  |                       |
|--------------------|---------------------|------------------|-----------------------|
| Sample Name:       | wr081114-1-Ac-AD30% | Acquired By:     | System                |
| Sample Type:       | Unknown             | Date Acquired:   | 11/16/2008 3:13:19 AM |
| Vial:              | 1                   | Acq. Method:     | wchao30%430           |
| Injection #:       | 3                   | Date Processed:  | 11/16/2008 3:41:51 AM |
| Injection Volume:  | 20.00 ul            | Channel Name:    | 2487Channel 1         |
| Run Time:          | 100.00 Minutes      | Sample Set Name: |                       |

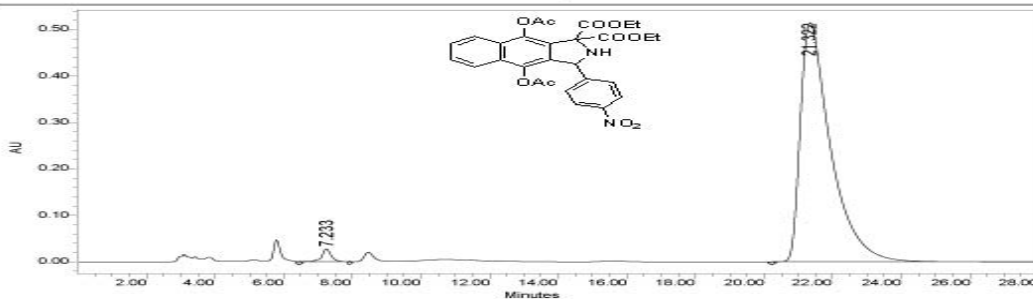

|   | RT (min) | Area (V*sec) | % Area | Height (V) | % Height |
|---|----------|--------------|--------|------------|----------|
| 1 | 7.233    | 547058       | 1.70   | 27854      | 5.13     |
| 2 | 21.322   | 31557529     | 98.30  | 515064     | 94.87    |

Report Method: Untitled

Printed 11:03:23 PM/15/2009

Page: 1 of 1



USTC  
 Project Name: wchao  
 Reported by User: System

*Breeze*

SAMPLE INFORMATION

|                   |                         |                  |                        |
|-------------------|-------------------------|------------------|------------------------|
| Sample Name:      | wr081119-1-Ac-rac-AS30% | Acquired By:     | System                 |
| Sample Type:      | Unknown                 | Date Acquired:   | 11/20/2008 10:55:10 PM |
| Vial:             | 1                       | Acq. Method:     | wchao30%430            |
| Injection #:      | 1                       | Date Processed:  | 11/20/2008 11:26:09 PM |
| Injection Volume: | 20.00 ul                | Channel Name:    | 2487Channel 1          |
| Run Time:         | 100.00 Minutes          | Sample Set Name: |                        |

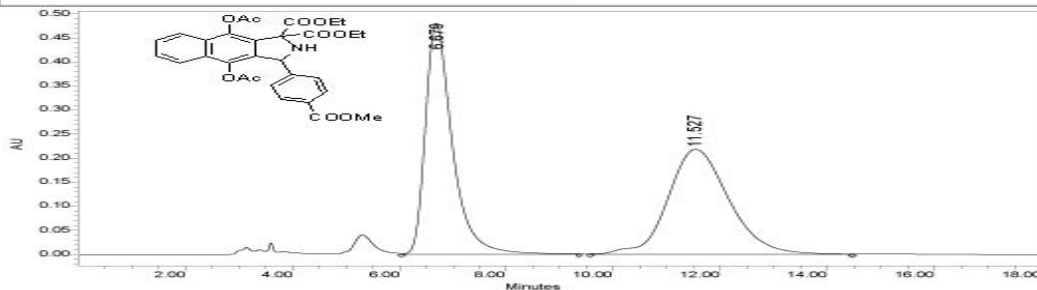

|   | RT (min) | Area (V <sup>2</sup> sec) | % Area | Height (V) | % Height |
|---|----------|---------------------------|--------|------------|----------|
| 1 | 6.679    | 16930336                  | 49.36  | 480512     | 68.74    |
| 2 | 11.527   | 17372838                  | 50.64  | 218554     | 31.26    |

Report Method: Untitled

Printed 11:54:49 PM/15/2009

Page: 1 of 1

USTC  
 Project Name: wchao  
 Reported by User: System

*Breeze*

SAMPLE INFORMATION

|                   |                     |                  |                        |
|-------------------|---------------------|------------------|------------------------|
| Sample Name:      | wr081119-1-Ac-AS30% | Acquired By:     | System                 |
| Sample Type:      | Unknown             | Date Acquired:   | 11/20/2008 11:17:24 PM |
| Vial:             | 1                   | Acq. Method:     | wchao30%430            |
| Injection #:      | 2                   | Date Processed:  | 11/23/2008 3:24:30 PM  |
| Injection Volume: | 20.00 ul            | Channel Name:    | 2487Channel 1          |
| Run Time:         | 100.00 Minutes      | Sample Set Name: |                        |

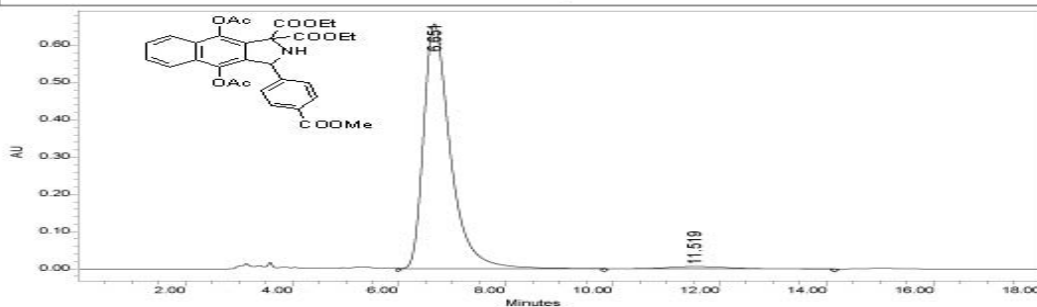

|   | RT (min) | Area (V <sup>2</sup> sec) | % Area | Height (V) | % Height |
|---|----------|---------------------------|--------|------------|----------|
| 1 | 6.651    | 22960365                  | 97.74  | 658124     | 99.05    |
| 2 | 11.519   | 530124                    | 2.26   | 6287       | 0.95     |

Report Method: Untitled

Printed 11:51:54 PM/15/2009

Page: 1 of 1

USTC  
Project Name: wchao  
Reported by User: System

*Breeze*

| SAMPLE INFORMATION |                     |                  |                      |
|--------------------|---------------------|------------------|----------------------|
| Sample Name:       | wr080805-1-Ac-AD15% | Acquired By:     | System               |
| Sample Type:       | Unknown             | Date Acquired:   | 1/8/2009 12:37:39 AM |
| Vial:              | 1                   | Acq. Method:     | wrchao2              |
| Injection #:       | 1                   | Date Processed:  | 1/8/2009 1:04:36 AM  |
| Injection Volume:  | 20.00 ul            | Channel Name:    | 2487Channel 1        |
| Run Time:          | 100.00 Minutes      | Sample Set Name: |                      |

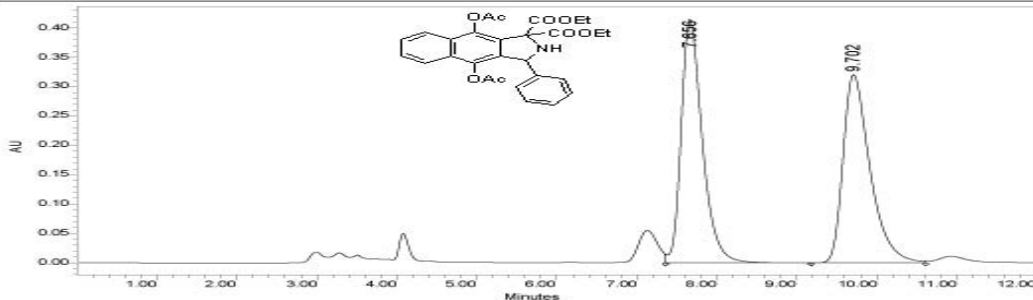

| RT (min) | Area (V*sec) | % Area | Height (V) | % Height |
|----------|--------------|--------|------------|----------|
| 1 7.656  | 7598441      | 50.28  | 415506     | 56.43    |
| 2 9.702  | 7514744      | 49.72  | 320844     | 43.57    |

Report Method: Untitled

Printed 11:36:54 PM/16/2009

Page: 1 of 1

USTC  
Project Name: wchao  
Reported by User: System

*Breeze*

| SAMPLE INFORMATION |                     |                  |                      |
|--------------------|---------------------|------------------|----------------------|
| Sample Name:       | wr090106-3-Ac-AD15% | Acquired By:     | System               |
| Sample Type:       | Unknown             | Date Acquired:   | 1/8/2009 12:51:54 AM |
| Vial:              | 1                   | Acq. Method:     | wrchao2              |
| Injection #:       | 2                   | Date Processed:  | 1/8/2009 1:04:34 AM  |
| Injection Volume:  | 20.00 ul            | Channel Name:    | 2487Channel 1        |
| Run Time:          | 100.00 Minutes      | Sample Set Name: |                      |

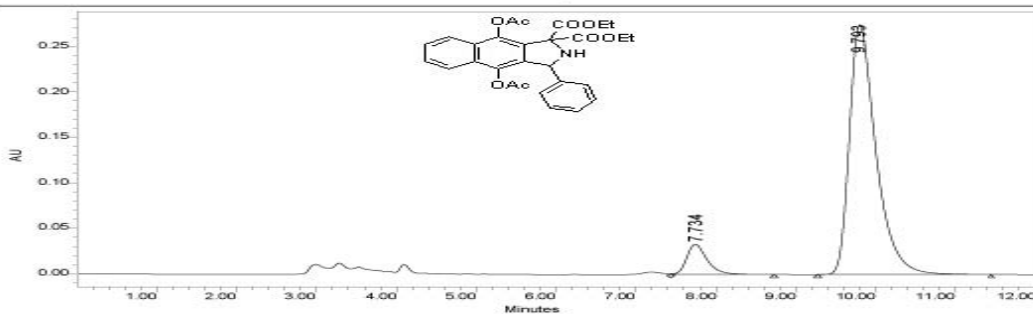

| RT (min) | Area (V*sec) | % Area | Height (V) | % Height |
|----------|--------------|--------|------------|----------|
| 1 7.734  | 586896       | 8.49   | 33227      | 10.78    |
| 2 9.793  | 6325995      | 91.51  | 274868     | 89.22    |

Report Method: Untitled

Printed 11:36:23 PM/16/2009

Page: 1 of 1

USTC  
Project Name: wchao  
Reported by User: System

*Breeze*

SAMPLE INFORMATION

Sample Name: wr080711-4-Ac-AD15%      Acquired By: System  
Sample Type: Unknown      Date Acquired: 1/8/2009 1:11:33 AM  
Vial: 1      Acq. Method: wrchao2  
Injection #: 3      Date Processed: 1/16/2009 11:38:40 PM  
Injection Volume: 20.00 ul      Channel Name: 2487Channel 1  
Run Time: 100.00 Minutes      Sample Set Name:

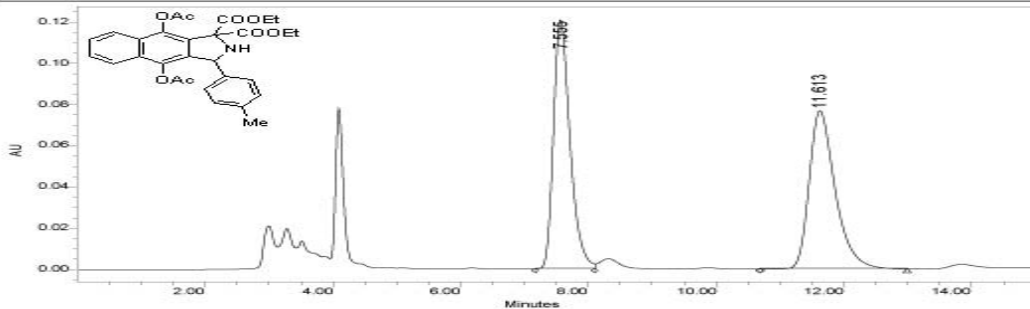

|   | RT (min) | Area (V*sec) | % Area | Height (V) | % Height |
|---|----------|--------------|--------|------------|----------|
| 1 | 7.555    | 2186751      | 50.13  | 121127     | 61.18    |
| 2 | 11.613   | 2175225      | 49.87  | 76871      | 38.82    |

Report Method: Untitled

Printed 11:39:01 PM/16/2009

Page: 1 of 1

USTC  
Project Name: wchao  
Reported by User: System

*Breeze*

SAMPLE INFORMATION

Sample Name: wr090106-1-Ac-AD15%      Acquired By: System  
Sample Type: Unknown      Date Acquired: 1/8/2009 1:29:16 AM  
Vial: 1      Acq. Method: wrchao2  
Injection #: 4      Date Processed: 1/8/2009 1:44:35 AM  
Injection Volume: 20.00 ul      Channel Name: 2487Channel 1  
Run Time: 100.00 Minutes      Sample Set Name:

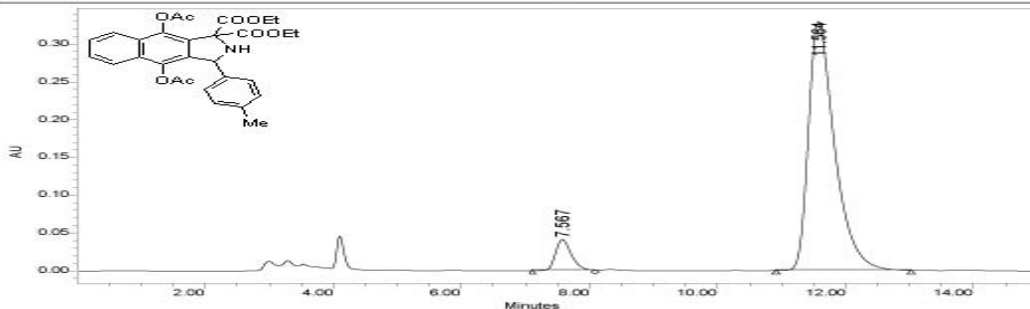

|   | RT (min) | Area (V*sec) | % Area | Height (V) | % Height |
|---|----------|--------------|--------|------------|----------|
| 1 | 7.567    | 721473       | 7.15   | 41343      | 11.15    |
| 2 | 11.564   | 9375272      | 92.85  | 329380     | 88.85    |

Report Method: Untitled

Printed 11:35:55 PM/16/2009

Page: 1 of 1



USTC  
 Project Name: wchao  
 Reported by User: System

*Breeze*

| SAMPLE INFORMATION |                     |                  |                       |
|--------------------|---------------------|------------------|-----------------------|
| Sample Name:       | wr081111-1-Ac-AS30% | Acquired By:     | System                |
| Sample Type:       | Unknown             | Date Acquired:   | 11/13/2008 6:20:02 PM |
| Vial:              | 1                   | Acq. Method:     | wchao30%t30           |
| Injection #:       | 1                   | Date Processed:  | 11/13/2008 6:32:28 PM |
| Injection Volume:  | 20.00 ul            | Channel Name:    | 2487Channel 1         |
| Run Time:          | 100.00 Minutes      | Sample Set Name: |                       |

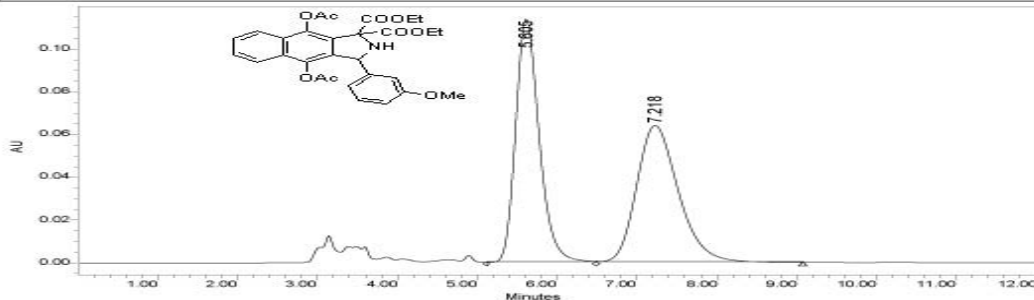

|   | RT (min) | Area (V*sec) | % Area | Height (V) | % Height |
|---|----------|--------------|--------|------------|----------|
| 1 | 5.605    | 2338150      | 50.05  | 113909     | 63.99    |
| 2 | 7.218    | 2333569      | 49.95  | 64108      | 36.01    |

Report Method: Untitled

Printed 12:01:55 AM/16/2009

Page: 1 of 1

USTC  
 Project Name: wchao  
 Reported by User: System

*Breeze*

| SAMPLE INFORMATION |                     |                  |                       |
|--------------------|---------------------|------------------|-----------------------|
| Sample Name:       | wr081111-2-Ac-AS30% | Acquired By:     | System                |
| Sample Type:       | Unknown             | Date Acquired:   | 11/13/2008 6:38:43 PM |
| Vial:              | 1                   | Acq. Method:     | wchao30%t30           |
| Injection #:       | 2                   | Date Processed:  | 11/13/2008 6:51:50 PM |
| Injection Volume:  | 20.00 ul            | Channel Name:    | 2487Channel 1         |
| Run Time:          | 100.00 Minutes      | Sample Set Name: |                       |

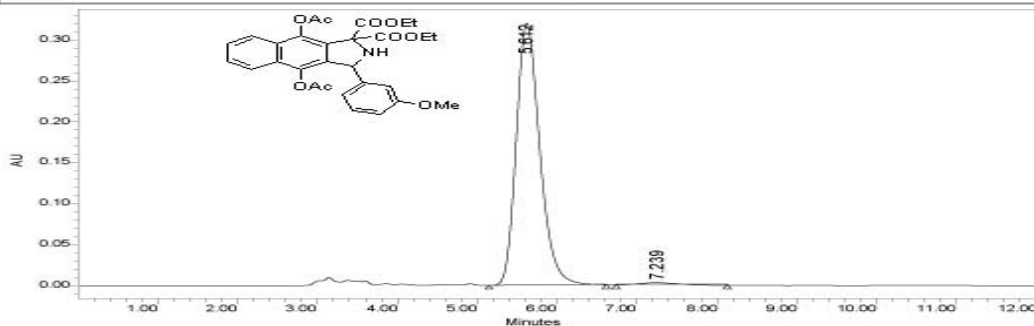

|   | RT (min) | Area (V*sec) | % Area | Height (V) | % Height |
|---|----------|--------------|--------|------------|----------|
| 1 | 5.612    | 6541047      | 98.65  | 320401     | 99.14    |
| 2 | 7.239    | 89655        | 1.35   | 2790       | 0.86     |

Report Method: Untitled

Printed 12:01:05 AM/16/2009

Page: 1 of 1

USTC  
Project Name: wchao  
Reported by User: System

*Breeze*

| SAMPLE INFORMATION |                         |                  |                       |
|--------------------|-------------------------|------------------|-----------------------|
| Sample Name:       | wr081129-2-Ac-rac-AS10% | Acquired By:     | System                |
| Sample Type:       | Unknown                 | Date Acquired:   | 12/1/2008 12:55:18 AM |
| Vial:              | 1                       | Acq. Method:     | wchao10%t30           |
| Injection #:       | 1                       | Date Processed:  | 12/1/2008 1:09:26 AM  |
| Injection Volume:  | 20.00 ul                | Channel Name:    | 2487Channel 1         |
| Run Time:          | 100.00 Minutes          | Sample Set Name: |                       |

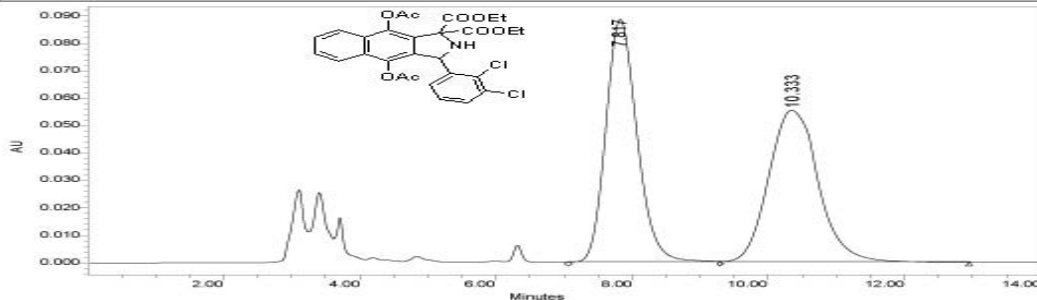

|   | RT (min) | Area (V*sec) | % Area | Height (V) | % Height |
|---|----------|--------------|--------|------------|----------|
| 1 | 7.817    | 2840338      | 50.07  | 88667      | 61.51    |
| 2 | 10.333   | 2832012      | 49.93  | 55494      | 38.49    |

Report Method: Untitled

Printed 12:06:47 AM/16/2009

Page: 1 of 1

USTC  
Project Name: wchao  
Reported by User: System

*Breeze*

| SAMPLE INFORMATION |                     |                  |                      |
|--------------------|---------------------|------------------|----------------------|
| Sample Name:       | wr081129-2-Ac-AS10% | Acquired By:     | System               |
| Sample Type:       | Unknown             | Date Acquired:   | 12/1/2008 1:10:17 AM |
| Vial:              | 1                   | Acq. Method:     | wchao10%t30          |
| Injection #:       | 2                   | Date Processed:  | 12/1/2008 1:25:20 AM |
| Injection Volume:  | 20.00 ul            | Channel Name:    | 2487Channel 1        |
| Run Time:          | 100.00 Minutes      | Sample Set Name: |                      |

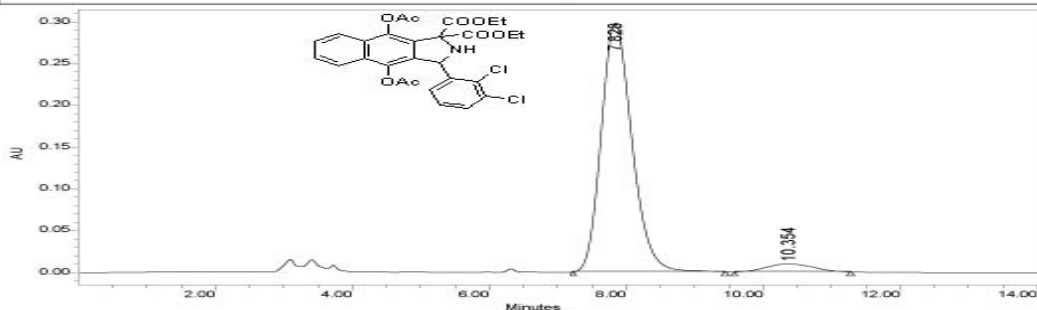

|   | RT (min) | Area (V*sec) | % Area | Height (V) | % Height |
|---|----------|--------------|--------|------------|----------|
| 1 | 7.828    | 9305787      | 95.41  | 298097     | 96.89    |
| 2 | 10.354   | 447445       | 4.59   | 9556       | 3.11     |

Report Method: Untitled

Printed 12:06:13 AM/16/2009

Page: 1 of 1

USTC  
Project Name: wchao  
Reported by User: System

*Breeze*

| SAMPLE INFORMATION |                         |                  |                        |
|--------------------|-------------------------|------------------|------------------------|
| Sample Name:       | wr081114-4-Ac-rac-AD15% | Acquired By:     | System                 |
| Sample Type:       | Unknown                 | Date Acquired:   | 11/17/2008 10:40:12 PM |
| Vial:              | 1                       | Acq. Method:     | wchao15%430            |
| Injection #:       | 1                       | Date Processed:  | 11/17/2008 10:55:33 PM |
| Injection Volume:  | 20.00 ul                | Channel Name:    | 2487Channel 1          |
| Run Time:          | 100.00 Minutes          | Sample Set Name: |                        |

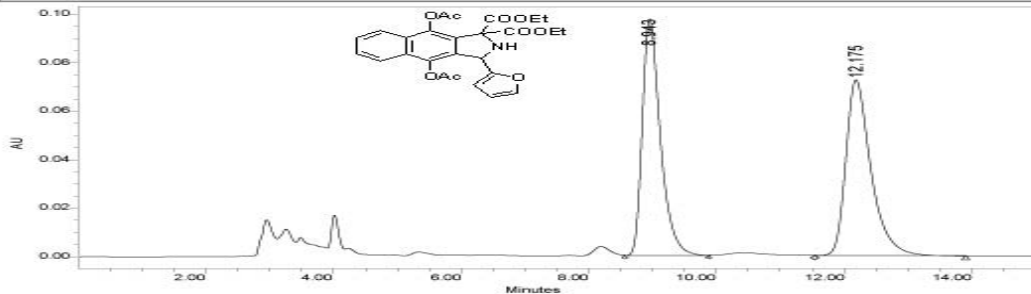

|   | RT (min) | Area (V*sec) | % Area | Height (V) | % Height |
|---|----------|--------------|--------|------------|----------|
| 1 | 8.943    | 1931300      | 49.22  | 97791      | 57.36    |
| 2 | 12.175   | 1992341      | 50.78  | 72709      | 42.64    |

Report Method: Untitled

Printed 12:05:16 AM/16/2009

Page: 1 of 1

USTC  
Project Name: wchao  
Reported by User: System

*Breeze*

| SAMPLE INFORMATION |                     |                  |                        |
|--------------------|---------------------|------------------|------------------------|
| Sample Name:       | wr081114-4-Ac-AD15% | Acquired By:     | System                 |
| Sample Type:       | Unknown             | Date Acquired:   | 11/17/2008 10:59:57 PM |
| Vial:              | 1                   | Acq. Method:     | wchao15%430            |
| Injection #:       | 2                   | Date Processed:  | 11/17/2008 11:16:38 PM |
| Injection Volume:  | 20.00 ul            | Channel Name:    | 2487Channel 1          |
| Run Time:          | 100.00 Minutes      | Sample Set Name: |                        |

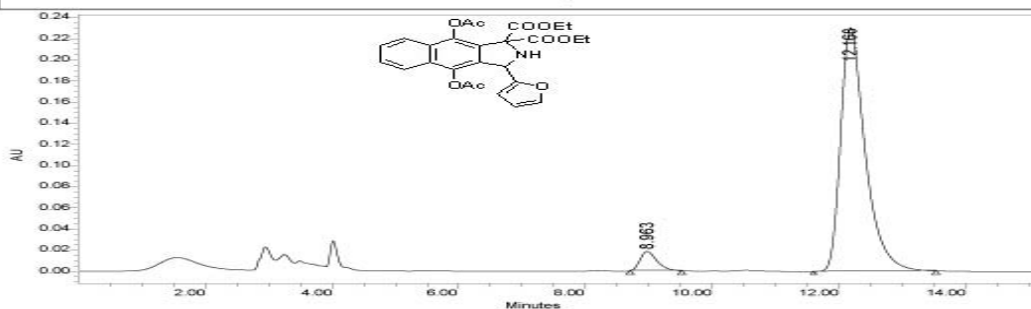

|   | RT (min) | Area (V*sec) | % Area | Height (V) | % Height |
|---|----------|--------------|--------|------------|----------|
| 1 | 8.963    | 336717       | 5.15   | 18311      | 7.36     |
| 2 | 12.168   | 6205184      | 94.85  | 230505     | 92.64    |

Report Method: Untitled

Printed 12:04:38 AM/16/2009

Page: 1 of 1

USTC  
Project Name: wchao  
Reported by User: System

*Breeze*

| SAMPLE INFORMATION |                     |                  |                      |
|--------------------|---------------------|------------------|----------------------|
| Sample Name:       | wr080908-1-Ac-AS30% | Acquired By:     | System               |
| Sample Type:       | Unknown             | Date Acquired:   | 9/17/2008 5:33:16 PM |
| Vial:              | 1                   | Acq. Method:     | wchao1               |
| Injection #:       | 2                   | Date Processed:  | 9/17/2008 6:03:55 PM |
| Injection Volume:  | 20.00 ul            | Channel Name:    | 2487Channel 1        |
| Run Time:          | 60.00 Minutes       | Sample Set Name: |                      |

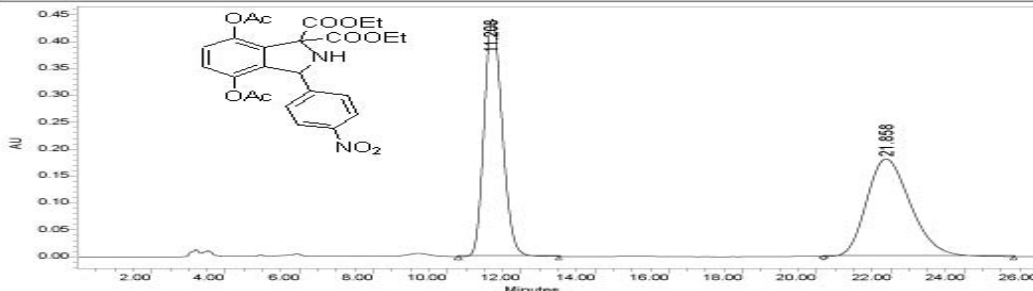

|   | RT (min) | Area (V*sec) | % Area | Height (V) | % Height |
|---|----------|--------------|--------|------------|----------|
| 1 | 11.208   | 15040039     | 50.01  | 441874     | 70.86    |
| 2 | 21.858   | 15031625     | 49.99  | 181730     | 29.14    |

Report Method: Untitled

Printed 10:38:38 PM/16/2009

Page: 1 of 1

USTC  
Project Name: wchao  
Reported by User: System

*Breeze*

| SAMPLE INFORMATION |                     |                  |                      |
|--------------------|---------------------|------------------|----------------------|
| Sample Name:       | wr081103-1-Ac-AS30% | Acquired By:     | System               |
| Sample Type:       | Unknown             | Date Acquired:   | 11/6/2008 5:03:17 PM |
| Vial:              | 1                   | Acq. Method:     | wchao30%430          |
| Injection #:       | 1                   | Date Processed:  | 11/6/2008 5:38:39 PM |
| Injection Volume:  | 20.00 ul            | Channel Name:    | 2487Channel 1        |
| Run Time:          | 100.00 Minutes      | Sample Set Name: |                      |

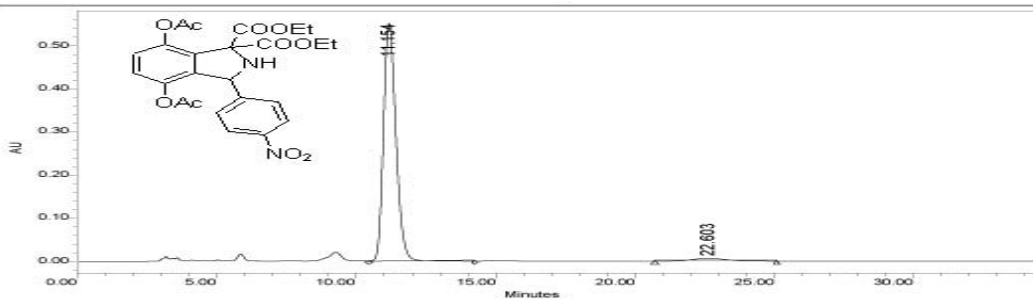

|   | RT (min) | Area (V*sec) | % Area | Height (V) | % Height |
|---|----------|--------------|--------|------------|----------|
| 1 | 11.154   | 17086579     | 96.96  | 551457     | 98.82    |
| 2 | 22.603   | 535772       | 3.04   | 6591       | 1.18     |

Report Method: Untitled

Printed 10:35:57 PM/16/2009

Page: 1 of 1

USTC  
 Project Name: wchao  
 Reported by User: System

*Breeze*

| SAMPLE INFORMATION |                     |                  |                       |
|--------------------|---------------------|------------------|-----------------------|
| Sample Name:       | wr081111-3-Ac-AS30% | Acquired By:     | System                |
| Sample Type:       | Unknown             | Date Acquired:   | 11/13/2008 8:08:15 PM |
| Vial:              | 1                   | Acq. Method:     | wchao30%430           |
| Injection #:       | 6                   | Date Processed:  | 11/13/2008 8:21:00 PM |
| Injection Volume:  | 20.00 ul            | Channel Name:    | 2487Channel 1         |
| Run Time:          | 100.00 Minutes      | Sample Set Name: |                       |

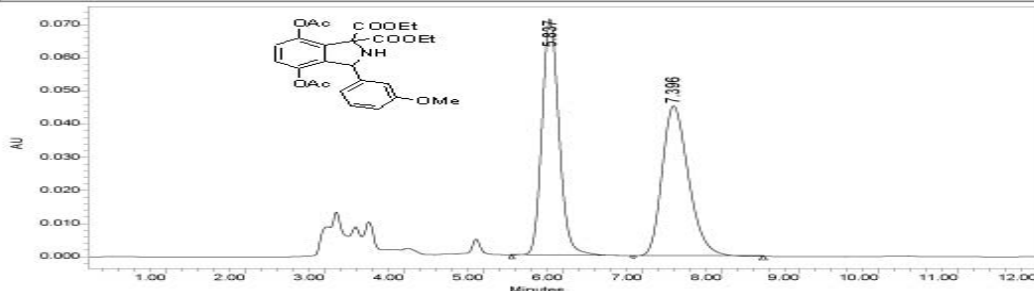

| RT (min) | Area (V <sup>2</sup> sec) | % Area | Height (V) | % Height |
|----------|---------------------------|--------|------------|----------|
| 1 5.837  | 1066837                   | 50.38  | 71342      | 61.16    |
| 2 7.396  | 1050816                   | 49.62  | 45300      | 38.84    |

Report Method: Untitled

Printed 10:54:25 PM/16/2009

Page: 1 of 1

USTC  
 Project Name: wchao  
 Reported by User: System

*Breeze*

| SAMPLE INFORMATION |                     |                  |                       |
|--------------------|---------------------|------------------|-----------------------|
| Sample Name:       | wr081111-4-Ac-AS30% | Acquired By:     | System                |
| Sample Type:       | Unknown             | Date Acquired:   | 11/13/2008 7:48:23 PM |
| Vial:              | 1                   | Acq. Method:     | wchao30%430           |
| Injection #:       | 5                   | Date Processed:  | 11/13/2008 8:01:29 PM |
| Injection Volume:  | 20.00 ul            | Channel Name:    | 2487Channel 1         |
| Run Time:          | 100.00 Minutes      | Sample Set Name: |                       |

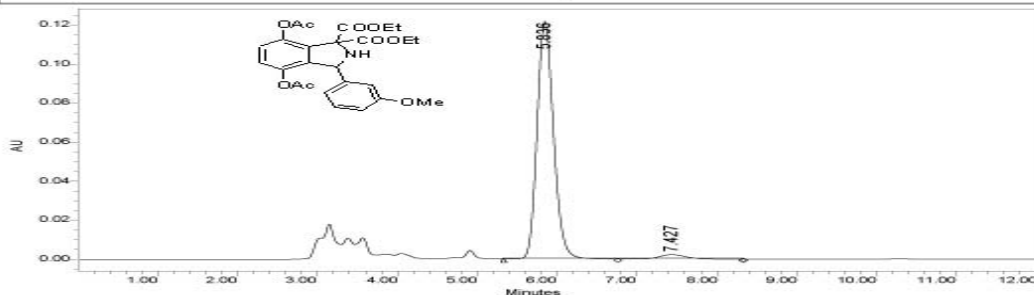

| RT (min) | Area (V <sup>2</sup> sec) | % Area | Height (V) | % Height |
|----------|---------------------------|--------|------------|----------|
| 1 5.836  | 1736944                   | 97.01  | 121715     | 98.15    |
| 2 7.427  | 53453                     | 2.99   | 2296       | 1.85     |

Report Method: Untitled

Printed 10:53:44 PM/16/2009

Page: 1 of 1

USTC  
 Project Name: wchao  
 Reported by User: System

*Breeze*

| SAMPLE INFORMATION |                     |                  |                       |
|--------------------|---------------------|------------------|-----------------------|
| Sample Name:       | wr081201-2-Ac-OD15% | Acquired By:     | System                |
| Sample Type:       | Unknown             | Date Acquired:   | 12/17/2008 3:04:54 PM |
| Vial:              | 1                   | Acq. Method:     | wchao15%430           |
| Injection #:       | 3                   | Date Processed:  | 12/17/2008 3:31:24 PM |
| Injection Volume:  | 20.00 ul            | Channel Name:    | 2487Channel 1         |
| Run Time:          | 100.00 Minutes      | Sample Set Name: |                       |

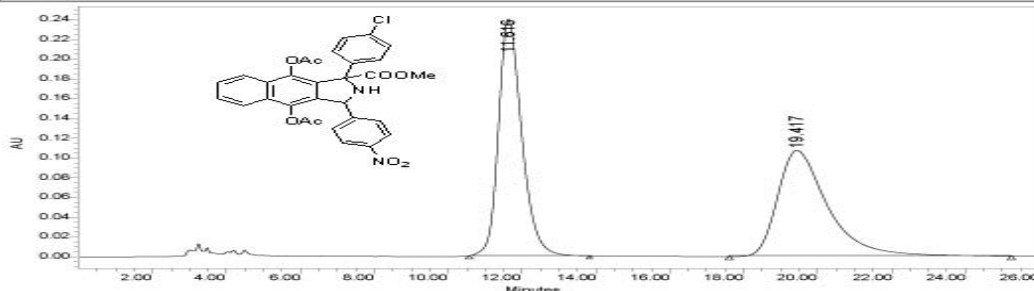

| RT (min) | Area (V*sec) | % Area | Height (V) | % Height |
|----------|--------------|--------|------------|----------|
| 1 11.616 | 10444257     | 50.73  | 239485     | 69.04    |
| 2 19.417 | 10143196     | 49.27  | 107375     | 30.96    |

Report Method: Untitled

Printed 11:19:05 PM/16/2009

Page: 1 of 1

USTC  
 Project Name: wchao  
 Reported by User: System

*Breeze*

| SAMPLE INFORMATION |                     |                  |                       |
|--------------------|---------------------|------------------|-----------------------|
| Sample Name:       | wr081209-3-Ac-OD15% | Acquired By:     | System                |
| Sample Type:       | Unknown             | Date Acquired:   | 12/13/2008 6:50:44 PM |
| Vial:              | 1                   | Acq. Method:     | wchao15%430           |
| Injection #:       | 1                   | Date Processed:  | 12/13/2008 7:17:14 PM |
| Injection Volume:  | 20.00 ul            | Channel Name:    | 2487Channel 1         |
| Run Time:          | 100.00 Minutes      | Sample Set Name: |                       |

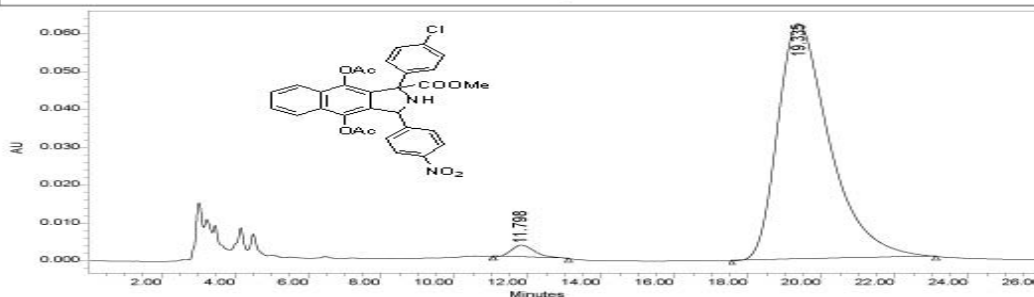

| RT (min) | Area (V*sec) | % Area | Height (V) | % Height |
|----------|--------------|--------|------------|----------|
| 1 11.798 | 151610       | 2.41   | 3249       | 4.95     |
| 2 19.335 | 6129786      | 97.59  | 62373      | 95.05    |

Report Method: Untitled

Printed 11:16:50 PM/16/2009

Page: 1 of 1

USTC  
Project Name: wchao  
Reported by User: System

*Breeze*

### SAMPLE INFORMATION

Sample Name: wr081206-1-Ac-OD10%  
Sample Type: Unknown  
Vial: 1  
Injection #: 1  
Injection Volume: 20.00 ul  
Run Time: 100.00 Minutes

Acquired By: System  
Date Acquired: 12/13/2008 5:48:19 PM  
Acq. Method: wchao10%430  
Date Processed: 12/13/2008 6:12:55 PM  
Channel Name: 2487Channel 1  
Sample Set Name:

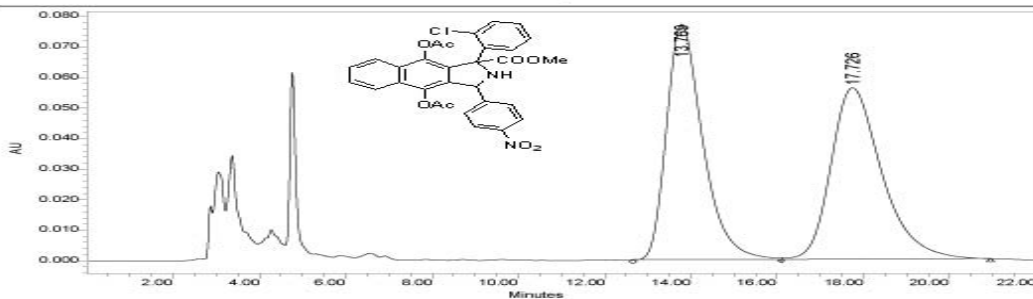

|   | RT (min) | Area (V*sec) | % Area | Height (V) | % Height |
|---|----------|--------------|--------|------------|----------|
| 1 | 13.769   | 4512419      | 49.52  | 77257      | 57.89    |
| 2 | 17.726   | 4600519      | 50.48  | 56193      | 42.11    |

Report Method: Untitled

Printed 11:23:19 PM/16/2009

Page: 1 of 1

USTC  
Project Name: wchao  
Reported by User: System

*Breeze*

### SAMPLE INFORMATION

Sample Name: wr081208-1-Ac-OD10%  
Sample Type: Unknown  
Vial: 1  
Injection #: 2  
Injection Volume: 20.00 ul  
Run Time: 100.00 Minutes

Acquired By: System  
Date Acquired: 12/13/2008 6:13:36 PM  
Acq. Method: wchao10%430  
Date Processed: 12/13/2008 6:41:14 PM  
Channel Name: 2487Channel 1  
Sample Set Name:

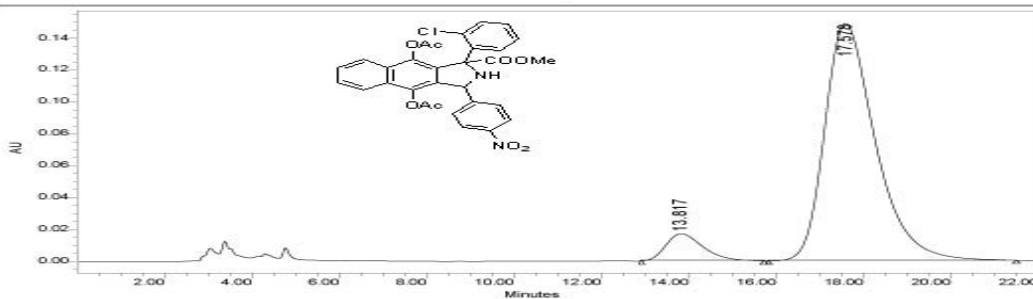

|   | RT (min) | Area (V*sec) | % Area | Height (V) | % Height |
|---|----------|--------------|--------|------------|----------|
| 1 | 13.817   | 1001451      | 7.71   | 17001      | 10.25    |
| 2 | 17.578   | 11982708     | 92.29  | 148895     | 89.75    |

Report Method: Untitled

Printed 11:21:53 PM/16/2009

Page: 1 of 1



USTC  
Project Name: wchao  
Reported by User: System

*Breeze*

| SAMPLE INFORMATION |                            |                  |                       |
|--------------------|----------------------------|------------------|-----------------------|
| Sample Name:       | wr081227-p-Cl-Tf-rac-AD10% | Acquired By:     | System                |
| Sample Type:       | Unknown                    | Date Acquired:   | 12/30/2008 9:01:53 PM |
| Vial:              | 1                          | Acq. Method:     | wrchao10%             |
| Injection #:       | 1                          | Date Processed:  | 12/30/2008 9:13:47 PM |
| Injection Volume:  | 20.00 ul                   | Channel Name:    | 2487Channel 1         |
| Run Time:          | 100.00 Minutes             | Sample Set Name: |                       |

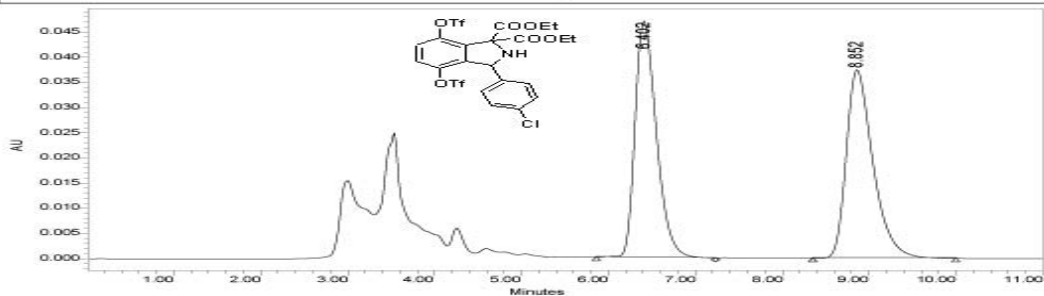

|   | RT (min) | Area (V*sec) | % Area | Height (V) | % Height |
|---|----------|--------------|--------|------------|----------|
| 1 | 6.402    | 801519       | 50.03  | 46896      | 55.62    |
| 2 | 8.852    | 800417       | 49.97  | 37412      | 44.38    |

Report Method: Untitled

Printed 11:28:57 PM/16/2009

Page: 1 of 1

USTC  
Project Name: wchao  
Reported by User: System

*Breeze*

| SAMPLE INFORMATION |                     |                  |                      |
|--------------------|---------------------|------------------|----------------------|
| Sample Name:       | wr081230-1-Tf-AD10% | Acquired By:     | System               |
| Sample Type:       | Unknown             | Date Acquired:   | 1/1/2009 10:05:58 PM |
| Vial:              | 1                   | Acq. Method:     | wrchao10%            |
| Injection #:       | 1                   | Date Processed:  | 1/1/2009 10:17:12 PM |
| Injection Volume:  | 20.00 ul            | Channel Name:    | 2487Channel 1        |
| Run Time:          | 100.00 Minutes      | Sample Set Name: |                      |

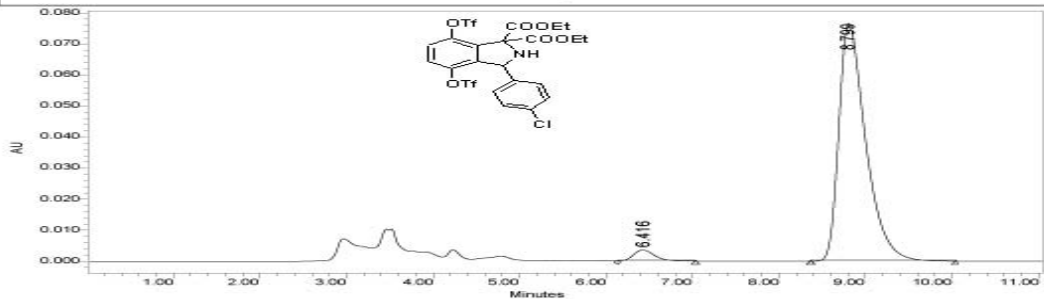

|   | RT (min) | Area (V*sec) | % Area | Height (V) | % Height |
|---|----------|--------------|--------|------------|----------|
| 1 | 6.416    | 60545        | 3.53   | 3578       | 4.46     |
| 2 | 8.799    | 1652723      | 96.47  | 76592      | 95.54    |

Report Method: Untitled

Printed 11:31:35 PM/16/2009

Page: 1 of 1



USTC  
Project Name: wchao  
Reported by User: System

*Breeze*

| SAMPLE INFORMATION |                            |               |               |                  |                        |
|--------------------|----------------------------|---------------|---------------|------------------|------------------------|
| Sample Name:       | wr081227-p-Cl-2H-rac-AD10% | Acquired By:  | System        | Date Acquired:   | 12/30/2008 10:26:23 PM |
| Sample Type:       | Unknown                    | Acq. Method:  | wrchao10%     | Date Processed:  | 1/16/2009 11:34:02 PM  |
| Vial:              | 1                          | Channel Name: | 2487Channel 1 | Sample Set Name: |                        |
| Injection #:       | 1                          |               |               |                  |                        |
| Injection Volume:  | 20.00 ul                   |               |               |                  |                        |
| Run Time:          | 100.00 Minutes             |               |               |                  |                        |

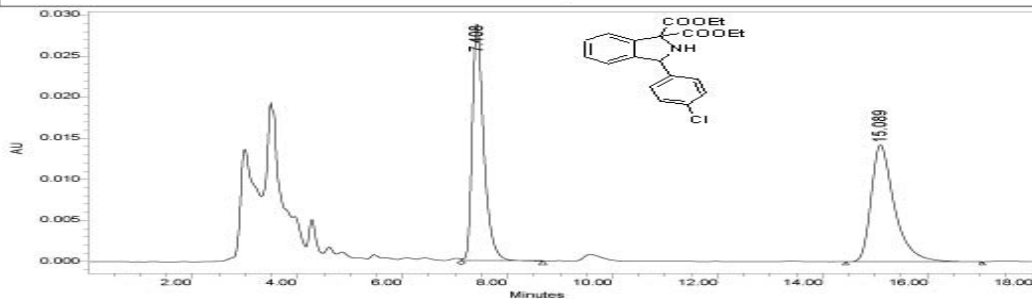

|   | RT (min) | Area (V*sec) | % Area | Height (V) | % Height |
|---|----------|--------------|--------|------------|----------|
| 1 | 7.408    | 440382       | 50.27  | 28965      | 67.09    |
| 2 | 15.089   | 435599       | 49.73  | 14211      | 32.91    |

Report Method: Untitled

Printed 11:34:56 PM/16/2009

Page: 1 of 1

USTC  
Project Name: wchao  
Reported by User: System

*Breeze*

| SAMPLE INFORMATION |                     |               |               |                  |                       |
|--------------------|---------------------|---------------|---------------|------------------|-----------------------|
| Sample Name:       | wr081230-1-2H-AD10% | Acquired By:  | System        | Date Acquired:   | 1/15/2009 10:36:35 PM |
| Sample Type:       | Unknown             | Acq. Method:  | wrchao10%     | Date Processed:  | 1/15/2009 10:55:29 PM |
| Vial:              | 1                   | Channel Name: | 2487Channel 1 | Sample Set Name: |                       |
| Injection #:       | 1                   |               |               |                  |                       |
| Injection Volume:  | 20.00 ul            |               |               |                  |                       |
| Run Time:          | 100.00 Minutes      |               |               |                  |                       |

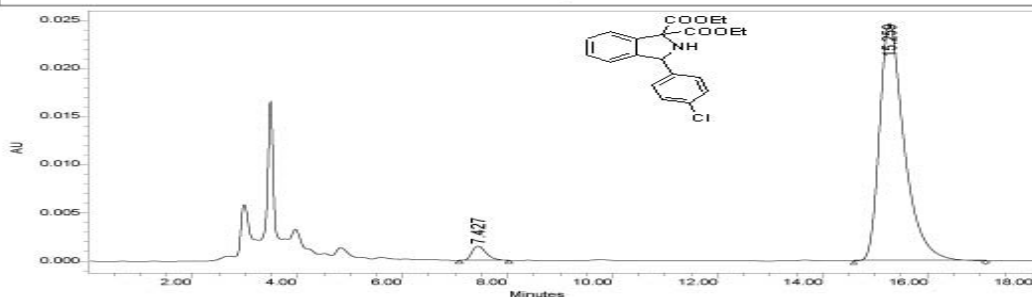

|   | RT (min) | Area (V*sec) | % Area | Height (V) | % Height |
|---|----------|--------------|--------|------------|----------|
| 1 | 7.427    | 27872        | 3.33   | 1470       | 5.62     |
| 2 | 15.259   | 808068       | 96.67  | 24681      | 94.38    |

Report Method: Untitled

Printed 11:29:34 PM/16/2009

Page: 1 of 1
